# Supplementary material
Source: Springer Nature journal article supplement (https://www.springermedizin.de/resource/supplementary/13058_2013_3430_MOESM1_ESM.pdf/9704152)
Supplement: MOESM1 [file 9704152]

**Supplementary Table S1. Patient information and tumor pathological data of 501 breast tumors in internal training cohort (GSE16987) and internal validation cohort (GSE45725)**

| Sample_title    | GEO_series_accession | GEO_platform_accession | GEO_sample_accession | GEO_raw_data/rep          | Sample_type/rep | Sample_RIN/rep | Patient_age | Surgical_margin(cm) | Tumor_type    | Tumor_size(cm) | Tumor_grade | Positive_LN(total_LN) | LVI | EIC | ER  | PR  | HER2 | CMTC | Recurrence | Recurrence-free_months | Used_in_the_431B_C_dataset? |
|-----------------|----------------------|------------------------|----------------------|---------------------------|-----------------|----------------|-------------|---------------------|---------------|----------------|-------------|-----------------------|-----|-----|-----|-----|------|------|------------|------------------------|-----------------------------|
| Breast tumor 1  | GSE16987             | GPL6104                | GSM425140            | 1825371052_B/1699538091_H | FNA/FNA         | 6.2/6.2        | 42          | 0.018               | IDC           | 1.5            | 2           | 0(15)                 | (-) | (-) | (+) | (-) | (-)  | 3    | 0          | 74.07                  | yes                         |
| Breast tumor 2  | GSE16987             | GPL6104                | GSM425141            | 1825371052_C              | FNA             | 8.7            | 56          | 0.45                | IDC/Lobular   | 2.2            | 3           | 0(3)                  | (-) | (-) | (-) | (-) | (-)  | 2    | 0          | 39.47                  | yes                         |
| Breast tumor 3  | GSE16987             | GPL6104                | GSM425142            | 1825371052_D              | FNA             | 7.7            | 40          | 0.3                 | IDC           | 1.5            | 2           | 0(7)                  | (-) | (-) | (+) | (+) | (-)  | 1    | 0          | 32.77                  | yes                         |
| Breast tumor 4  | GSE16987             | GPL6104                | GSM425143            | 1825371052_E              | FNA             | 7.0            | 46          | 0.19                | IDC           | 2.6            | 2           | 0(5)                  | (-) | (-) | (+) | (+) | (-)  | 1    | 0          | 70.93                  | yes                         |
| Breast tumor 5  | GSE16987             | GPL6104                | GSM425144            | 1825371085_B              | FNA             | 7.1            | 44          | 1                   | DCIS/IDC      | 2.1            | 2           | 0(6)                  | (+) | (+) | (+) | (+) | (-)  | NA   | 0          | 31.93                  | no                          |
| Breast tumor 6  | GSE16987             | GPL6104                | GSM425145            | 1825371085_C              | FNA             | 7.3            | 63          | 1.1                 | IDC           | 1.8            | 1           | 0(3)                  | (-) | (-) | (+) | (-) | (-)  | 1    | 0          | 67.50                  | yes                         |
| Breast tumor 7  | GSE16987             | GPL6104                | GSM425146            | 1825371085_D              | FNA             | 8.4            | 47          | 0.32                | IDC           | 4              | 3           | 8(18)                 | (+) | (+) | (-) | (-) | (+)  | 3    | 0          | 68.47                  | yes                         |
| Breast tumor 8  | GSE16987             | GPL6104                | GSM425147            | 1825371085_E              | FNA             | 8.7            | 48          | 0.46                | IDC           | 1.9            | 2           | 2(11)                 | (-) | (-) | (+) | (+) | (-)  | 2    | 0          | 71.63                  | yes                         |
| Breast tumor 9  | GSE16987             | GPL6104                | GSM425148            | 1825371086_B              | FNA             | 7.1            | 51          | 1.2                 | IDC           | 2.7            | 3           | 2(20)                 | (+) | (-) | (+) | (-) | (-)  | 2    | 1          | 52.63                  | yes                         |
| Breast tumor 10 | GSE16987             | GPL6104                | GSM425149            | 1825371086_C              | FNA             | 7.2            | 72          | 0.2                 | IDC           | 3              | 3           | 0(1)                  | (-) | (-) | (+) | (+) | (-)  | 2    | 1          | 8.93                   | yes                         |
| Breast tumor 11 | GSE16987             | GPL6104                | GSM425150            | 1825371086_D              | FNA             | 7.2            | 84          | 0.4                 | IDC           | 2.1            | 1           | 0(1)                  | (+) | (-) | (+) | (+) | (-)  | 1    | 0          | 49.57                  | yes                         |
| Breast tumor 12 | GSE16987             | GPL6104                | GSM425151            | 1825371086_E              | FNA             | 7.4            | 72          | 0.4                 | IDC           | 1.5            | 1           | 0(2)                  | (-) | (-) | (+) | (+) | (-)  | 1    | 0          | 55.90                  | yes                         |
| Breast tumor 13 | GSE16987             | GPL6104                | GSM425152            | 1825371087_B              | CBX             | 8.2            | 58          | 0.075               | IDC           | 3.5            | 2           | 1(17)                 | (-) | (-) | (+) | (-) | (-)  | 3    | 0          | 71.63                  | yes                         |
| Breast tumor 14 | GSE16987             | GPL6104                | GSM425153            | 1825371087_C              | CBX             | 7.6            | 49          | 0.4                 | IDC           | 3.6            | 2           | 0(4)                  | (-) | (+) | (+) | (+) | (-)  | 1    | 0          | 73.13                  | yes                         |
| Breast tumor 15 | GSE16987             | GPL6104                | GSM425154            | 1825371087_D              | FNA             | 8.3            | 43          | 0.3                 | IDC           | 2.9            | 3           | 1(4)                  | (+) | (-) | (-) | (-) | (-)  | 3    | 0          | 64.17                  | yes                         |
| Breast tumor 16 | GSE16987             | GPL6104                | GSM425155            | 1825371087_E              | CBX             | 8.1            | 73          | 1                   | IDC           | 2.8            | 3           | 2(20)                 | (-) | (-) | (+) | (-) | (-)  | 2    | 0          | 61.03                  | yes                         |
| Breast tumor 17 | GSE16987             | GPL6104                | GSM425156            | 1825371097_B              | FNA             | 7.5            | 31          | 1                   | IDC           | 3.5            | 3           | 7(16)                 | (+) | (-) | (+) | (-) | (+)  | 3    | 0          | 71.53                  | yes                         |
| Breast tumor 18 | GSE16987             | GPL6104                | GSM425157            | 1825371097_C              | FNA             | 8.7            | 67          | 0.1                 | IDC           | 2              | 2           | 1(19)                 | (+) | (-) | (+) | (+) | (-)  | 2    | 0          | 67.27                  | yes                         |
| Breast tumor 19 | GSE16987             | GPL6104                | GSM425158            | 1825371097_D              | FNA             | 9.1            | 45          | 0.1                 | IDC           | 2.8            | 3           | 0(3)                  | (-) | (-) | (-) | (-) | (-)  | 3    | 0          | 22.77                  | yes                         |
| Breast tumor 20 | GSE16987             | GPL6104                | GSM425159            | 1825371097_E              | FNA             | 9.0            | 46          | 0.1                 | IDC           | 2.8            | 3           | 0(3)                  | (-) | (-) | (-) | (-) | (-)  | 3    | NA         | NA                     | no                          |
| Breast tumor 21 | GSE16987             | GPL6104                | GSM425160            | 1825371099_B              | CBX             | 9.1            | 46          | 0.6                 | IDC           | 0.8            | 1           | 0(3)                  | (-) | (+) | (+) | (+) | (-)  | 1    | 0          | 62.53                  | yes                         |
| Breast tumor 22 | GSE16987             | GPL6104                | GSM425161            | 1825371099_C              | CBX             | 9.0            | 68          | 0.65                | IDC/Papilloma | 1.4            | 2           | 0(2)                  | (-) | (-) | (+) | (+) | (-)  | 1    | 0          | 62.30                  | yes                         |
| Breast tumor 23 | GSE16987             | GPL6104                | GSM425162            | 1825371099_D              | FNA             | 8.7            | 51          | 0.2                 | IDC           | 1.4            | 1           | 0(2)                  | (-) | (-) | (+) | (+) | (-)  | 1    | 0          | 69.13                  | yes                         |
| Breast tumor 24 | GSE16987             | GPL6104                | GSM425163            | 1825371099_E/1699538082_A | FNA/FNA         | 8.1/7.7        | 80          | 0.3                 | IDC           | 2              | 3           | 0(1)                  | (-) | (-) | (-) | (-) | (-)  | 3    | 1          | 3.27                   | yes                         |
| Breast tumor 25 | GSE16987             | GPL6104                | GSM425164            | 1699538082_C              | FNA             | 9.4            | 46          | 0.4                 | IDC           | 2              | 2           | 0(2)                  | (-) | (+) | (+) | (+) | (+)  | 1    | 0          | 21.50                  | yes                         |
| Breast tumor 26 | GSE16987             | GPL6104                | GSM425165            | 1699538082_E/1699538082_F | FNA/FNA         | 8.3/8.0        | 48          | 0.12                | IDC/lobular   | 2.1            | 2           | 0(1)                  | (-) | (-) | (+) | (+) | (-)  | 1    | 0          | 68.87                  | yes                         |
| Breast tumor 27 | GSE16987             | GPL6104                | GSM425166            | 1699538082_G              | FNA             | 7.8            | 69          | 1.2                 | IDC           | 3.3            | 1           | 4(23)                 | (-) | (-) | (+) | (+) | (-)  | 1    | 0          | 61.33                  | yes                         |
| Breast tumor 28 | GSE16987             | GPL6104                | GSM425167            | 1699538083_A              | FNA             | 7.0            | 62          | NA                  | Benign        | NA             | NA          | 0(3)                  | NA  | NA  | NA  | NA  | NA   | 0    | 0          | 0.47                   | no                          |
| Breast tumor 29 | GSE16987             | GPL6104                | GSM425168            | 1699538083_B              | FNA             | 6.8            | 45          | 0                   | IDC/lobular   | 4.2            | 3           | 1(25)                 | (+) | (-) | (+) | (+) | (-)  | 1    | 0          | 59.07                  | yes                         |
| Breast tumor 30 | GSE16987             | GPL6104                | GSM425169            | 1699538083_C/1699538083_D | FNA/FNA         | 7.3/8.9        | 52          | 0.29                | IDC           | 2.8            | 2           | 0(1)                  | (+) | (-) | (+) | (-) | (-)  | 2    | 0          | 68.67                  | yes                         |
| Breast tumor 31 | GSE16987             | GPL6104                | GSM425170            | 1699538083_E/1699538083_F | FNA/FNA         | 8.6/8.5        | 29          | 0.6                 | IDC           | 1.9            | 3           | 0(4)                  | (-) | (-) | (-) | (-) | (-)  | 3    | 0          | 66.73                  | yes                         |
| Breast tumor 32 | GSE16987             | GPL6104                | GSM425171            | 1699538083_G              | FNA             | 6.2            | 44          | 0.2                 | IDC           | 2.3            | 2           | 1(16)                 | (+) | (-) | (+) | (-) | (-)  | 2    | 0          | 59.33                  | yes                         |
| Breast tumor 33 | GSE16987             | GPL6104                | GSM425172            | 1699538089_A              | FNA             | 8.4            | 56          | 0.65                | IDC           | 2.5            | 3           | 13(28)                | (+) | (-) | (+) | (+) | (-)  | 2    | 0          | 6.87                   | yes                         |
| Breast tumor 34 | GSE16987             | GPL6104                | GSM425173            | 1699538089_B              | FNA             | 7.2            | 57          | 0.4                 | IDC           | 1              | 2           | 8(35)                 | (-) | (-) | (+) | (-) | (-)  | 2    | 0          | 36.20                  | yes                         |
| Breast tumor 35 | GSE16987             | GPL6104                | GSM425174            | 1699538089_C              | Tissue          | 6.5            | 50          | 0.5                 | IDC           | 3.5            | 2           | 2(17)                 | (+) | (-) | (+) | (+) | (-)  | 1    | NA         | NA                     | no                          |
| Breast tumor 36 | GSE16987             | GPL6104                | GSM425175            | 1699538089_D              | Tissue          | 7.3            | 70          | 0.3                 | IDC           | 3              | 2           | 42(44)                | (+) | (-) | (+) | (-) | (-)  | 2    | 0          | 104.57                 | yes                         |
| Breast tumor 37 | GSE16987             | GPL6104                | GSM425176            | 1699538089_E              | Tissue          | 5.8            | 61          | 0                   | IDC           | 2.4            | 2           | 2(18)                 | (-) | (-) | (+) | (-) | (+)  | 2    | 1          | 39.00                  | yes                         |
| Breast tumor 38 | GSE16987             | GPL6104                | GSM425177            | 1699538089_F              | Tissue          | 7.8            | 63          | 0.8                 | IDC           | 2.3            | 3           | 0(18)                 | (-) | (-) | (+) | (-) | (-)  | 1    | 0          | 61.10                  | yes                         |
| Breast tumor 39 | GSE16987             | GPL6104                | GSM425178            | 1699538089_G              | Tissue          | 7.6            | 59          | 2.5                 | IDC           | 4              | 3           | 1(22)                 | (-) | (-) | (+) | (-) | (-)  | 2    | 1          | 15.67                  | yes                         |
| Breast tumor 40 | GSE16987             | GPL6104                | GSM425179            | 1699538090_A              | Tissue          | 6.0            | 65          | 0.03                | IDC           | 2.7            | 3           | 4(17)                 | (+) | (-) | (+) | (-) | (+)  | 2    | 0          | 84.50                  | yes                         |
| Breast tumor 41 | GSE16987             | GPL6104                | GSM425180            | 1699538090_B              | Tissue          | 7.6            | 43          | 1                   | IDC           | 1.5            | 3           | 4(13)                 | (+) | (-) | (+) | (+) | (-)  | 1    | 1          | 2.00                   | yes                         |
| Breast tumor 42 | GSE16987             | GPL6104                | GSM425181            | 1699538090_C              | Tissue          | 7.0            | 69          | 3                   | IDC           | 2.5            | 2           | 7(13)                 | (-) | (-) | (+) | (-) | (-)  | 1    | 0          | 99.83                  | yes                         |
| Breast tumor 43 | GSE16987             | GPL6104                | GSM425182            | 1699538090_D              | Tissue          | 7.5            | 42          | 0.7                 | IDC           | 2.9            | 3           | 2(27)                 | (+) | (-) | (+) | (+) | (-)  | 1    | 0          | 95.23                  | yes                         |
| Breast tumor 44 | GSE16987             | GPL6104                | GSM425183            | 1699538090_E              | Tissue          | 6.6            | 57          | 0.4                 | IDC           | 4.7            | 3           | 7(15)                 | (+) | (+) | (-) | (-) | (+)  | 3    | 0          | 97.83                  | yes                         |
| Breast tumor 45 | GSE16987             | GPL6104                | GSM425184            | 1699538090_F              | Tissue          | 7.5            | 46          | 0.3                 | IDC           | 2.2            | 3           | 2(17)                 | (+) | (+) | (-) | (-) | (+)  | 3    | 0          | 83.40                  | yes                         |



| Sample_title     | GEO_series_accession | GEO_platform_accession | GEO_sample_accession | GEO_raw_data/rep          | Sample_type/rep | Sample_RIN/rep | Patient_age | Surgical_margin(cm) | Tumor_type | Tumor_size(cm) | Tumor_grade | Positive_LN(total_LN) | LVI | EIC | ER  | PR  | HER2 | CMTC | Recurrence | Recurrence-free_months | Used_in_the_431B_C_dataset? |
|------------------|----------------------|------------------------|----------------------|---------------------------|-----------------|----------------|-------------|---------------------|------------|----------------|-------------|-----------------------|-----|-----|-----|-----|------|------|------------|------------------------|-----------------------------|
| Breast tumor 93  | GSE16987             | GPL6104                | GSM425232            | 1787466026_E              | CBX             | NA             | 49          | NA                  | Benign     | NA             | NA          | NA                    | NA  | NA  | NA  | NA  | NA   | NA   | NA         | NA                     | no                          |
| Breast tumor 94  | GSE16987             | GPL6104                | GSM425233            | 1787466026_G              | CBX             | 7.2            | 57          | 0.2                 | IDC        | 1.5            | 1           | 0(3)                  | (-) | (-) | (+) | (-) | (-)  | 1    | 0          | 61.90                  | yes                         |
| Breast tumor 95  | GSE16987             | GPL6104                | GSM425234            | 1787466037_A              | FNA             | 6.8            | 60          | NA                  | Benign     | NA             | NA          | 0(4)                  | NA  | NA  | NA  | NA  | NA   | NA   | 0          | 24.17                  | no                          |
| Breast tumor 96  | GSE16987             | GPL6104                | GSM425235            | 1787466037_B              | FNA             | 8.6            | 53          | 0                   | ILC        | 0.8            | 2           | 0(5)                  | (+) | (-) | (+) | (+) | (-)  | 2    | 0          | 40.00                  | yes                         |
| Breast tumor 97  | GSE16987             | GPL6104                | GSM425236            | 1787466037_C              | FNA             | 9.3            | 35          | 0.075               | IDC        | 5.9            | 3           | 6(19)                 | (+) | (+) | (+) | (+) | (-)  | 2    | 0          | 15.97                  | yes                         |
| Breast tumor 98  | GSE16987             | GPL6104                | GSM425237            | 1787466037_D              | FNA             | 6.9            | 59          | 0.3                 | IDC        | 1              | 3           | 0(2)                  | (-) | (+) | (+) | (-) | (+)  | 1    | 0          | 51.73                  | yes                         |
| Breast tumor 99  | GSE16987             | GPL6104                | GSM425238            | 1787466037_E              | FNA             | 8.8            | 47          | 0.15                | IDC        | 1.9            | 2           | 1(19)                 | (-) | (-) | (+) | (+) | (-)  | 2    | 0          | 62.10                  | yes                         |
| Breast tumor 100 | GSE16987             | GPL6104                | GSM425239            | 1787466037_F              | FNA             | 9.0            | 68          | 0.3                 | IDC        | 1.4            | 2           | 0(3)                  | (-) | (-) | (-) | (-) | (-)  | 3    | 0          | 57.43                  | yes                         |
| Breast tumor 101 | GSE16987             | GPL6104                | GSM425240            | 1787466037_G              | FNA             | 9.5            | 35          | 0.07                | IDC        | 2.6            | 2           | 2(5)                  | (+) | (-) | (-) | (-) | (+)  | 3    | 0          | 38.27                  | yes                         |
| Breast tumor 102 | GSE16987             | GPL6104                | GSM425241            | 1787466038_A              | FNA             | 9.2            | 55          | 1.05                | IDC        | 2.9            | 3           | 0(3)                  | (+) | (-) | (-) | (-) | (+)  | 3    | 0          | 15.80                  | yes                         |
| Breast tumor 103 | GSE16987             | GPL6104                | GSM425242            | 1787466038_B              | FNA             | 9.0            | 75          | 1.1                 | IDC        | 2.3            | 3           | 1(4)                  | (-) | (-) | (-) | (-) | (+)  | 3    | 0          | 57.43                  | yes                         |
| Breast tumor 104 | GSE16987             | GPL6104                | GSM425243            | 1787466038_C              | FNA             | 7.4            | 47          | 0.16                | IDC        | 2.5            | 3           | 3(24)                 | (-) | (-) | (+) | (+) | (-)  | 2    | 1          | 28.37                  | yes                         |
| Breast tumor 105 | GSE16987             | GPL6104                | GSM425244            | 1787466038_D              | FNA             | 9.3            | 64          | 0.9                 | IDC        | 3              | 3           | 2(38)                 | (+) | (+) | (+) | (+) | (-)  | 2    | 0          | 63.20                  | yes                         |
| Breast tumor 106 | GSE16987             | GPL6104                | GSM425245            | 1787466038_E              | CBX             | 8.1            | 66          | 0.9                 | IDC        | 2.3            | 2           | 1(19)                 | (+) | (-) | (+) | (+) | (+)  | 1    | 0          | 53.00                  | yes                         |
| Breast tumor 107 | GSE16987             | GPL6104                | GSM425246            | 1787466038_F              | FNA             | 6.5            | 63          | 0.8                 | IDC        | 1.6            | 3           | 0(5)                  | (-) | (-) | (-) | (-) | (-)  | 3    | 0          | 63.77                  | yes                         |
| Breast tumor 108 | GSE16987             | GPL6104                | GSM425247            | 1787466038_G              | FNA             | 6.7            | 83          | 0.45                | DCIS       | 1.5            | 2           | 0(0)                  | (-) | NA  | NA  | NA  | NA   | NA   | 0          | 18.50                  | no                          |
| Breast tumor 109 | GSE16987             | GPL6104                | GSM425248            | 1787466039_A              | FNA             | 6.7            | 53          | 1.3                 | IDC        | 3.5            | 3           | 2(19)                 | (-) | (+) | (-) | (-) | (+)  | 3    | 0          | 47.63                  | yes                         |
| Breast tumor 110 | GSE16987             | GPL6104                | GSM425249            | 1787466039_B              | FNA             | 9.6            | 61          | 0.3                 | IDC        | 2.2            | 3           | 0(2)                  | (-) | (-) | (+) | (+) | (-)  | 2    | 0          | 59.97                  | yes                         |
| Breast tumor 111 | GSE16987             | GPL6104                | GSM425250            | 1787466039_C              | FNA             | 7.3            | 69          | 0.4                 | IDC        | 1.3            | 2           | 3(10)                 | (-) | (-) | (+) | (+) | (-)  | 2    | 0          | 57.47                  | yes                         |
| Breast tumor 112 | GSE16987             | GPL6104                | GSM425251            | 1787466039_D              | FNA             | 5.6            | 66          | 0.4                 | ILC        | 2.1            | 2           | 2(18)                 | (-) | (-) | (+) | (+) | (-)  | 1    | 0          | 54.77                  | yes                         |
| Breast tumor 113 | GSE16987             | GPL6104                | GSM425252            | 1787466039_E              | FNA             | 7.4            | 50          | 0.9                 | IDC/ILC    | 2.6            | 3           | 0(3)                  | (+) | (-) | (-) | (-) | (+)  | 3    | 0          | 50.80                  | yes                         |
| Breast tumor 114 | GSE16987             | GPL6104                | GSM425253            | 1787466039_F              | FNA             | 9.1            | 62          | 0.9                 | IDC        | 2.5            | 3           | 2(12)                 | (+) | (-) | (+) | (+) | (-)  | 2    | 0          | 27.97                  | yes                         |
| Breast tumor 115 | GSE16987             | GPL6104                | GSM425254            | 1787466039_G              | FNA             | 9.0            | 45          | 0.3                 | IDC        | 2.2            | 3           | 2(17)                 | (+) | (+) | (+) | (+) | (+)  | 2    | 0          | 60.70                  | yes                         |
| Breast tumor 116 | GSE16987             | GPL6104                | GSM425255            | 1888849028_A              | FNA             | 6.4            | 85          | 0.5                 | IDC        | 1.5            | 2           | 0(2)                  | (-) | (-) | (+) | (+) | (-)  | 1    | 0          | 52.03                  | yes                         |
| Breast tumor 117 | GSE16987             | GPL6104                | GSM425256            | 1888849028_B              | FNA             | 8.3            | 38          | 0.15                | IDC        | 4.5            | 3           | 2(10)                 | (-) | (+) | (-) | (-) | (+)  | 3    | 0          | 34.03                  | yes                         |
| Breast tumor 118 | GSE16987             | GPL6104                | GSM425257            | 1888849028_C              | FNA             | 7.0            | 81          | 1.3                 | DCIS/IDC   | 0.11           | NA          | 0(3)                  | (-) | (-) | (+) | (+) | (-)  | NA   | 0          | 17.90                  | no                          |
| Breast tumor 119 | GSE16987             | GPL6104                | GSM425258            | 1888849028_D/1888849036_G | FNA/FNA         | 5.8/5.4        | 77          | 0.42                | ILC        | 2.4            | 2           | 0(2)                  | (-) | (-) | (+) | (+) | (-)  | 1    | 0          | 52.57                  | yes                         |
| Breast tumor 120 | GSE16987             | GPL6104                | GSM425259            | 1888849028_E              | FNA             | 6.5            | 43          | 0.2                 | DCIS       | 7              | 3           | 0(4)                  | (-) | (-) | NA  | NA  | NA   | NA   | 0          | 16.73                  | no                          |
| Breast tumor 121 | GSE16987             | GPL6104                | GSM425260            | 1888849028_F              | FNA             | 7.2            | 53          | 0.24                | IDC        | 2.6            | 3           | 1(15)                 | (+) | (-) | (+) | (-) | (-)  | 2    | 0          | 23.20                  | yes                         |
| Breast tumor 122 | GSE16987             | GPL6104                | GSM425261            | 1888849028_G              | FNA             | 6.1            | 34          | 0.05                | IDC        | 2.5            | 2           | 0(3)                  | (-) | (-) | (+) | (-) | (-)  | 2    | 0          | 58.17                  | yes                         |
| Breast tumor 123 | GSE16987             | GPL6104                | GSM425262            | 1888849036_A              | FNA             | 7.3            | 67          | 0.05                | IDC        | 2.5            | 3           | 0(2)                  | (-) | (-) | (+) | (+) | (-)  | 2    | 0          | 51.57                  | yes                         |
| Breast tumor 124 | GSE16987             | GPL6104                | GSM425263            | 1888849036_B              | FNA             | 7.9            | 41          | 1                   | IDC        | 1.1            | 3           | 0(2)                  | (-) | (-) | (-) | (-) | (-)  | 3    | 0          | 54.20                  | yes                         |
| Breast tumor 125 | GSE16987             | GPL6104                | GSM425264            | 1888849036_C              | FNA             | 8.2            | 60          | 0.1                 | IDC        | 3              | 3           | 0(2)                  | (-) | (-) | (-) | (-) | (+)  | 3    | 1          | 21.50                  | yes                         |
| Breast tumor 126 | GSE16987             | GPL6104                | GSM425265            | 1888849036_E              | FNA             | 4.5            | 70          | 1.5                 | ILC        | 11             | 2           | 0(20)                 | (-) | (-) | (+) | (-) | (-)  | NA   | NA         | NA                     | no                          |
| Breast tumor 127 | GSE16987             | GPL6104                | GSM425266            | 1888849036_F              | FNA             | 7.7            | 59          | 0.5                 | IDC        | 2.8            | 3           | 0(4)                  | (-) | (-) | (+) | (+) | (-)  | 2    | 0          | 56.47                  | yes                         |
| Breast tumor 128 | GSE16987             | GPL6104                | GSM425267            | 4098316007_A              | FNA             | 7.8            | 65          | 0.5                 | IDC        | 2.4            | 3           | 0(4)                  | (-) | (-) | (+) | (-) | (-)  | 2    | 0          | 59.80                  | yes                         |
| Breast tumor 129 | GSE16987             | GPL6104                | GSM425268            | 4098316007_B              | FNA             | 8.7            | 73          | 0.34                | IDC        | 2              | 2           | 0(1)                  | (-) | (-) | (+) | (+) | (-)  | 2    | 0          | 59.37                  | yes                         |
| Breast tumor 130 | GSE16987             | GPL6104                | GSM425269            | 4098316007_C              | FNA             | 6.7            | 50          | 0.1                 | IDC        | 1.1            | 1           | 0(2)                  | (-) | (+) | (+) | (-) | (-)  | 1    | 0          | 31.57                  | yes                         |
| Breast tumor 131 | GSE16987             | GPL6104                | GSM425270            | 4098316007_D              | FNA             | 8.5            | 46          | 0.03                | IDC        | 1.8            | 3           | 5(35)                 | (+) | (-) | (-) | (-) | (-)  | 3    | 0          | 41.60                  | yes                         |
| Breast tumor 132 | GSE16987             | GPL6104                | GSM425271            | 4098316007_E              | FNA             | 9.4            | 65          | 0.04                | IDC        | 2.5            | 3           | 2(14)                 | (+) | (-) | (+) | (+) | (-)  | 2    | 0          | 11.00                  | yes                         |
| Breast tumor 133 | GSE16987             | GPL6104                | GSM425272            | 4098316007_F              | FNA             | 6.7            | 59          | 0                   | IDC        | 10.8           | 3           | 0(0)                  | (+) | (-) | (+) | (-) | (-)  | 2    | 0          | 50.90                  | yes                         |
| Breast tumor 134 | GSE16987             | GPL6104                | GSM425273            | 4098316007_G              | FNA             | 6.8            | 55          | 0.28                | IDC        | 3              | 3           | 0(6)                  | (-) | (-) | (-) | (-) | (-)  | 3    | 0          | 26.40                  | yes                         |
| Breast tumor 135 | GSE16987             | GPL6104                | GSM425274            | 4098316013_A              | FNA             | 5.7            | 61          | 0.23                | IDC        | 2              | 2           | 16(24)                | (-) | (-) | (+) | (+) | (-)  | 2    | 0          | 49.73                  | yes                         |
| Breast tumor 136 | GSE16987             | GPL6104                | GSM425275            | 4098316013_B              | FNA             | 8.3            | 48          | 0.45                | IMC        | 3.2            | 2           | 0(7)                  | (-) | (+) | (+) | (+) | (-)  | 2    | 0          | 57.07                  | yes                         |
| Breast tumor 137 | GSE16987             | GPL6104                | GSM425276            | 4098316013_C              | FNA             | 6.9            | 48          | 0.3                 | IDC        | 6              | 3           | 12(20)                | (+) | (-) | (-) | (-) | (+)  | 3    | 1          | 15.53                  | yes                         |
| Breast tumor 138 | GSE16987             | GPL6104                | GSM425277            | 4098316013_D              | FNA             | 7.2            | 49          | 0.5                 | IDC        | 1.6            | 2           | 1(20)                 | (-) | (-) | (+) | (+) | (-)  | 2    | 0          | 58.37                  | yes                         |
| Breast tumor 139 | GSE16987             | GPL6104                | GSM425278            | 4098316013_E              | FNA             | 7.8            | 75          | NA                  | ILC        | 7              | 3           | 3(17)                 | (+) | (-) | (+) | (+) | (-)  | 2    | 0          | 29.60                  | yes                         |

| Sample_title     | GEO_series_accession | GEO_platform_accession | GEO_sample_accession | GEO_raw_data/rep | Sample_type/rep | Sample_RIN/rep | Patient_age | Surgical_margin(cm) | Tumor_type | Tumor_size(cm) | Tumor_grade | Positive_LN(total_LN) | LVI | EIC | ER  | PR  | HER2 | CMTC | Recurrence | Recurrence-free_months | Used_in_the_431B_C_dataset? |
|------------------|----------------------|------------------------|----------------------|------------------|-----------------|----------------|-------------|---------------------|------------|----------------|-------------|-----------------------|-----|-----|-----|-----|------|------|------------|------------------------|-----------------------------|
| Breast tumor 140 | GSE16987             | GPL6104                | GSM425279            | 4098316013_F     | FNA             | 8.8            | 42          | 0.3                 | IDC        | 2.4            | 2           | 1(15)                 | (-) | (-) | (+) | (-) | (-)  | 2    | 0          | 49.50                  | yes                         |
| Breast tumor 141 | GSE16987             | GPL6104                | GSM425280            | 4098316013_G     | FNA             | 8.0            | 52          | 0                   | IDC        | 3              | 3           | 1(3)                  | (+) | (-) | (+) | (-) | (+)  | 2    | 0          | 49.60                  | yes                         |
| Breast tumor 142 | GSE16987             | GPL6104                | GSM425281            | 1888849005_B     | FNA             | 7.3            | 54          | 0.06                | IDC        | 2.1            | 3           | 0(3)                  | (-) | (-) | (+) | (+) | (-)  | 2    | 0          | 45.50                  | yes                         |
| Breast tumor 143 | GSE16987             | GPL6104                | GSM425282            | 1888849005_C     | FNA             | 8.4            | 53          | 0.32                | IDC        | 3.4            | 3           | 0(3)                  | (+) | (-) | (-) | (-) | (+)  | 3    | 1          | 13.97                  | yes                         |
| Breast tumor 144 | GSE16987             | GPL6104                | GSM425283            | 1888849005_D     | FNA             | 7.5            | 53          | 0.21                | IDC        | 3.6            | 3           | 14(21)                | (-) | (-) | (-) | (-) | (+)  | 3    | 1          | 22.57                  | yes                         |
| Breast tumor 145 | GSE16987             | GPL6104                | GSM425284            | 1888849005_E     | FNA             | 7.2            | 48          | 0.3                 | IMC        | 7.5            | 2           | 14(19)                | (-) | (-) | (+) | (+) | (-)  | 2    | 0          | 58.33                  | yes                         |
| Breast tumor 146 | GSE16987             | GPL6104                | GSM425285            | 1888849005_F     | FNA             | 6.2            | 48          | 0.23                | IDC        | 1.7            | 2           | 5(14)                 | (+) | (-) | (+) | (+) | (-)  | 1    | 0          | 50.93                  | yes                         |
| Breast tumor 147 | GSE16987             | GPL6104                | GSM425286            | 1888849005_G     | FNA             | 7.3            | 57          | 0.4                 | IDC        | 1.2            | 3           | 0(2)                  | (-) | (-) | (+) | (+) | (-)  | 2    | 0          | 54.20                  | yes                         |
| Breast tumor 148 | GSE16987             | GPL6104                | GSM425287            | 1888849006_A     | FNA             | 7.9            | 51          | 0.1                 | IDC        | 4              | 3           | 2(21)                 | (+) | (-) | (+) | (+) | (-)  | 2    | 0          | 53.87                  | yes                         |
| Breast tumor 149 | GSE16987             | GPL6104                | GSM425288            | 1888849006_B     | FNA             | 8.6            | 30          | 0                   | IDC        | 2.4            | 3           | 2(18)                 | (+) | (-) | (+) | (-) | (-)  | 2    | 0          | 54.20                  | yes                         |
| Breast tumor 150 | GSE16987             | GPL6104                | GSM425289            | 1888849006_C     | FNA             | 8.0            | 60          | NA                  | IDC        | 1.6            | 1           | 0(1)                  | (-) | NA  | (+) | (-) | (-)  | 2    | 0          | 41.13                  | yes                         |
| Breast tumor 151 | GSE16987             | GPL6104                | GSM425290            | 1888849006_D     | FNA             | 7.1            | 67          | 0.11                | IDC        | 1.2            | 2           | 0(5)                  | (+) | (-) | (+) | (-) | (-)  | 1    | 0          | 18.77                  | yes                         |
| Breast tumor 152 | GSE16987             | GPL6104                | GSM425291            | 1888849006_E     | FNA             | 7.5            | 72          | 0.3                 | IDC        | 2.1            | 2           | 0(3)                  | (+) | (-) | (+) | (+) | (-)  | 2    | 0          | 48.57                  | yes                         |
| Breast tumor 153 | GSE16987             | GPL6104                | GSM425292            | 1888849006_F     | FNA             | 7.8            | 43          | 0.4                 | IDC        | 2.3            | 2           | 0(2)                  | (-) | (-) | (-) | (-) | (-)  | 3    | 0          | 51.80                  | yes                         |
| Breast tumor 154 | GSE16987             | GPL6104                | GSM425293            | 1888849006_G     | FNA             | 8.3            | 66          | 0.8                 | IDC        | 1.9            | 3           | 0(4)                  | (-) | (-) | (+) | (-) | (-)  | 2    | 0          | 57.20                  | yes                         |
| Breast tumor 155 | GSE16987             | GPL6104                | GSM425294            | 4098316046_A     | FNA             | 5.6            | 69          | 3.5                 | IDC        | 1.8            | 3           | 0(1)                  | (-) | NA  | (-) | (-) | (-)  | 3    | 0          | 54.53                  | yes                         |
| Breast tumor 156 | GSE16987             | GPL6104                | GSM425295            | 4098316046_B     | FNA             | 8.7            | 52          | 0.8                 | IDC        | 2.1            | 1           | 0(2)                  | (-) | (-) | (+) | (+) | (-)  | 1    | 0          | 47.60                  | yes                         |
| Breast tumor 157 | GSE16987             | GPL6104                | GSM425296            | 4098316046_C     | FNA             | 7.9            | 45          | 0.005               | IDC        | 3.2            | 2           | 4(20)                 | (+) | (-) | (+) | (-) | (-)  | 2    | 0          | 55.77                  | yes                         |
| Breast tumor 158 | GSE16987             | GPL6104                | GSM425297            | 4098316046_D     | FNA             | 7.8            | 78          | 0.5                 | IDC        | 1.4            | 3           | 0(1)                  | (-) | NA  | (-) | (-) | (-)  | 3    | 0          | 54.97                  | yes                         |
| Breast tumor 159 | GSE16987             | GPL6104                | GSM425298            | 4098316046_E     | FNA             | 7.3            | 58          | 0.21                | IDC        | 1.4            | 2           | 0(3)                  | (-) | (-) | (+) | (+) | (-)  | 1    | 0          | 52.93                  | yes                         |
| Breast tumor 160 | GSE16987             | GPL6104                | GSM425299            | 4098316046_F     | FNA             | 8.3            | 81          | 0.1                 | IDC        | 1.5            | 2           | 2(17)                 | (+) | (-) | (+) | (+) | (-)  | 2    | 0          | 46.23                  | yes                         |
| Breast tumor 161 | GSE16987             | GPL6104                | GSM425300            | 4098316046_G     | FNA             | 8.3            | 73          | 0.2                 | IDC        | 0.8            | 2           | 0(1)                  | (+) | (+) | (+) | (+) | (-)  | 2    | 0          | 46.30                  | yes                         |
| Breast tumor 162 | GSE45725             | GPL6883                | GSM1112901           | 4256290013_C     | FNA             | 6.7            | 44          | 0.7                 | IDC        | 3.2            | 3           | 0(1)                  | (-) | (-) | (-) | (-) | (+)  | 3    | 0          | 46.90                  | yes                         |
| Breast tumor 163 | GSE45725             | GPL6883                | GSM1112902           | 4256290013_D     | FNA             | 6.9            | 72          | 0.13                | IDC        | 2.2            | 2           | 0(5)                  | (-) | (-) | (-) | (-) | (-)  | 3    | 0          | 17.90                  | yes                         |
| Breast tumor 164 | GSE45725             | GPL6883                | GSM1112903           | 4256290013_E     | FNA             | 6.8            | 74          | 0.09                | IDC        | 2.5            | 3           | 0(2)                  | (+) | (-) | (+) | (+) | (-)  | 2    | 0          | 49.93                  | yes                         |
| Breast tumor 165 | GSE45725             | GPL6883                | GSM1112904           | 4256290013_F     | FNA             | 7.7            | 50          | NA                  | Benign     | NA             | NA          | NA                    | NA  | NA  | NA  | NA  | NA   | 3    | NA         | NA                     | no                          |
| Breast tumor 166 | GSE45725             | GPL6883                | GSM1112905           | 4256290013_G     | FNA             | 6.3            | 78          | 0.3                 | IDC        | 2.2            | 2           | 0(2)                  | (-) | (-) | (+) | (+) | (-)  | 2    | 0          | 0.90                   | no                          |
| Breast tumor 167 | GSE45725             | GPL6883                | GSM1112906           | 4334518081_A     | FNA             | 6.5            | 49          | 0.5                 | ILC        | 3.1            | 2           | 0(3)                  | (-) | (-) | (+) | (+) | (-)  | 1    | 0          | 46.33                  | yes                         |
| Breast tumor 168 | GSE45725             | GPL6883                | GSM1112907           | 4334518081_B     | FNA             | 7.5            | 56          | 0.3                 | IDC        | 1.2            | 2           | 0(1)                  | (-) | (-) | (+) | (+) | (-)  | 3    | 0          | 47.93                  | yes                         |
| Breast tumor 169 | GSE45725             | GPL6883                | GSM1112908           | 4334518081_C     | FNA             | 8.8            | 77          | 1.3                 | IDC        | 2              | 1           | 0(3)                  | (-) | (-) | (+) | (+) | (-)  | 1    | 0          | 34.70                  | yes                         |
| Breast tumor 170 | GSE45725             | GPL6883                | GSM1112909           | 4334518081_D     | FNA             | 8.3            | 61          | 0.225               | IDC        | 2.2            | 3           | 2(18)                 | (+) | (+) | (+) | (-) | (+)  | 3    | 0          | 48.93                  | yes                         |
| Breast tumor 171 | GSE45725             | GPL6883                | GSM1112910           | 4334518081_E     | FNA             | 7.2            | 61          | 0.6                 | IMC        | 1.1            | 2           | 0(5)                  | (-) | (-) | (+) | (-) | (-)  | 1    | 0          | 47.67                  | yes                         |
| Breast tumor 172 | GSE45725             | GPL6883                | GSM1112911           | 4334518081_F     | FNA             | 6.9            | 56          | 0.65                | IDC        | 0.7            | 1           | 0(2)                  | (-) | (-) | (+) | (+) | (-)  | 1    | 0          | 45.43                  | yes                         |
| Breast tumor 173 | GSE45725             | GPL6883                | GSM1112912           | 4334518081_G     | FNA             | 7              | 61          | 0.5                 | IDC        | 0.5            | 1           | 1(2)                  | (-) | (-) | (+) | (+) | (-)  | 1    | 0          | 42.30                  | yes                         |
| Breast tumor 174 | GSE45725             | GPL6883                | GSM1112913           | 4334518087_A     | FNA             | 7              | 79          | 0.66                | ILC        | 3.6            | 2           | 0(4)                  | (-) | (-) | (+) | (-) | (-)  | 1    | 0          | 46.83                  | yes                         |
| Breast tumor 175 | GSE45725             | GPL6883                | GSM1112914           | 4334518087_B     | FNA             | 9.2            | 47          | 0.1                 | IDC        | 2.2            | 2           | 1(12)                 | (+) | (-) | (+) | (+) | (-)  | 2    | 0          | 51.17                  | yes                         |
| Breast tumor 176 | GSE45725             | GPL6883                | GSM1112915           | 4334518087_C     | FNA             | 6.3            | 45          | 1                   | IDC        | 6.4            | 3           | 16(19)                | (+) | (+) | (+) | (+) | (-)  | 2    | 0          | 45.13                  | yes                         |
| Breast tumor 177 | GSE45725             | GPL6883                | GSM1112916           | 4334518087_D     | FNA             | 7              | 63          | 0.33                | IDC        | 2.4            | 2           | 0(1)                  | (-) | (-) | (+) | (+) | (-)  | 2    | 0          | 49.47                  | yes                         |
| Breast tumor 178 | GSE45725             | GPL6883                | GSM1112917           | 4334518087_E     | FNA             | 8.9            | 76          | 0.2                 | IDC        | 2.8            | 3           | 0(3)                  | (-) | (-) | (+) | (+) | (-)  | 3    | 0          | 35.27                  | yes                         |
| Breast tumor 179 | GSE45725             | GPL6883                | GSM1112918           | 4334518087_F     | FNA             | 7.9            | 43          | 0                   | IDC        | 2.5            | 3           | 9(17)                 | (+) | (-) | (+) | (+) | (-)  | 2    | 0          | 47.37                  | yes                         |
| Breast tumor 180 | GSE45725             | GPL6883                | GSM1112919           | 4334518087_G     | FNA             | 8.3            | 42          | 1                   | IDC        | 3.9            | 3           | 1(3)                  | (+) | (-) | (+) | (-) | (-)  | 3    | 1          | 31.03                  | yes                         |
| Breast tumor 181 | GSE45725             | GPL6883                | GSM1112920           | 4334518100_A     | FNA             | 6.5            | 56          | 0.5                 | IDC        | 1.2            | 3           | 0(3)                  | (-) | (-) | (+) | (-) | (-)  | 1    | 0          | 48.77                  | yes                         |
| Breast tumor 182 | GSE45725             | GPL6883                | GSM1112921           | 4334518100_B     | FNA             | 8.6            | 66          | 0.8                 | IDC        | 2              | 2           | 1(2)                  | (-) | (-) | (+) | (+) | (-)  | 1    | 0          | 32.63                  | yes                         |
| Breast tumor 183 | GSE45725             | GPL6883                | GSM1112922           | 4334518100_C     | FNA             | 8.5            | 55          | 0.14                | IDC        | 1.7            | 3           | 0(2)                  | (-) | (-) | (+) | (+) | (-)  | 2    | 0          | 48.33                  | yes                         |
| Breast tumor 184 | GSE45725             | GPL6883                | GSM1112923           | 4334518100_D     | FNA             | 7.7            | 51          | 1.2                 | DCIS       | 1.2            | 2           | NA                    | NA  | NA  | NA  | NA  | NA   | 3    | 0          | 42.97                  | no                          |
| Breast tumor 185 | GSE45725             | GPL6883                | GSM1112924           | 4334518100_E     | FNA             | 8.3            | 51          | 0.3                 | IDC        | 1.6            | 3           | 1(23)                 | (+) | (-) | (-) | (-) | (-)  | 3    | 0          | 36.30                  | yes                         |
| Breast tumor 186 | GSE45725             | GPL6883                | GSM1112925           | 4334518100_F     | FNA             | 6.9            | 53          | 0.175               | ILC        | 7.1            | 2           | 3(12)                 | (-) | (-) | (+) | (+) | (-)  | 1    | 0          | 45.70                  | yes                         |

| Sample_title     | GEO_series_accession | GEO_platform_accession | GEO_sample_accession | GEO_raw_data/rep | Sample_type/rep | Sample_RIN/rep | Patient_age | Surgical_margin(cm) | Tumor_type | Tumor_size(cm) | Tumor_grade | Positive_LN(total_LN) | LVI | EIC | ER  | PR  | HER2 | CMTc | Recurrence | Recurrence-free_months | Used_in_the_431B_C_dataset? |
|------------------|----------------------|------------------------|----------------------|------------------|-----------------|----------------|-------------|---------------------|------------|----------------|-------------|-----------------------|-----|-----|-----|-----|------|------|------------|------------------------|-----------------------------|
| Breast tumor 187 | GSE45725             | GPL6883                | GSM1112926           | 4334518100_G     | FNA             | 7.7            | 68          | 1.5                 | IDC        | 0.88           | 2           | 0(1)                  | (-) | (-) | (+) | (+) | (-)  | 1    | 0          | 41.97                  | yes                         |
| Breast tumor 188 | GSE45725             | GPL6883                | GSM1112927           | 4334518100_H     | FNA             | 7.3            | 52          | 0.68                | IDC        | 1.6            | 2           | 1(1)                  | (+) | (-) | (+) | (-) | (-)  | 2    | 0          | 47.43                  | yes                         |
| Breast tumor 189 | GSE45725             | GPL6883                | GSM1112928           | 4334518108_A     | FNA             | 6              | 65          | 0.48                | ILC        | 1.7            | 2           | 2(3)                  | (-) | (-) | (+) | (+) | (-)  | 1    | 0          | 48.23                  | yes                         |
| Breast tumor 190 | GSE45725             | GPL6883                | GSM1112929           | 4334518108_B     | FNA             | 7.4            | 43          | 0.32                | IDC        | 1.6            | 3           | 0(6)                  | (-) | (-) | (-) | (-) | (-)  | 3    | 0          | 48.60                  | yes                         |
| Breast tumor 191 | GSE45725             | GPL6883                | GSM1112930           | 4334518108_C     | FNA             | 8.5            | 50          | 0.8                 | IDC        | 1              | 2           | 0(2)                  | (-) | (+) | (+) | (+) | (-)  | 1    | 0          | 47.73                  | yes                         |
| Breast tumor 192 | GSE45725             | GPL6883                | GSM1112931           | 4334518108_D     | FNA             | 7.8            | 54          | 0.2                 | IDC        | 3.9            | 3           | 3(11)                 | (+) | (-) | (+) | (+) | (-)  | 2    | 1          | 24.43                  | yes                         |
| Breast tumor 193 | GSE45725             | GPL6883                | GSM1112932           | 4334518108_E     | FNA             | 8.5            | 61          | 0.2                 | IDC        | 1.5            | 2           | 0(1)                  | (-) | (-) | (-) | (-) | (+)  | 3    | 0          | 47.80                  | yes                         |
| Breast tumor 194 | GSE45725             | GPL6883                | GSM1112933           | 4334518108_F     | FNA             | 6.6            | 58          | 0.41                | IDC        | 10.6           | 2           | 6(24)                 | (+) | (-) | (+) | (+) | (-)  | 1    | 0          | 47.00                  | yes                         |
| Breast tumor 195 | GSE45725             | GPL6883                | GSM1112934           | 4334518108_G     | FNA             | 7.8            | 64          | 0.76                | DCIS       | 1.6            | 3           | NA                    | NA  | NA  | NA  | NA  | NA   | 1    | 0          | 39.20                  | no                          |
| Breast tumor 196 | GSE45725             | GPL6883                | GSM1112935           | 4418463155_A     | FNA             | 7.9            | 74          | 0.1                 | IDC        | 1.8            | 2           | 4(25)                 | (+) | (-) | (+) | (-) | (-)  | 2    | 0          | 46.60                  | yes                         |
| Breast tumor 197 | GSE45725             | GPL6883                | GSM1112936           | 4418463155_B     | FNA             | 7.6            | 78          | 0.1                 | IDC        | 1.05           | 1           | 0(2)                  | (-) | (-) | (+) | (+) | (-)  | 1    | 0          | 46.43                  | yes                         |
| Breast tumor 198 | GSE45725             | GPL6883                | GSM1112937           | 4418463155_C     | FNA             | 7.6            | 57          | 0.8                 | IDC        | 2.2            | 1           | 0(2)                  | (-) | (-) | (+) | (+) | (-)  | 3    | 0          | 40.80                  | yes                         |
| Breast tumor 199 | GSE45725             | GPL6883                | GSM1112938           | 4418463155_D     | FNA             | 3.7            | 55          | 1.45                | IDC        | 4              | 3           | 0(6)                  | (-) | (-) | (-) | (+) | (-)  | 3    | 0          | 34.90                  | no                          |
| Breast tumor 200 | GSE45725             | GPL6883                | GSM1112939           | 4418463155_E     | FNA             | 2.7            | 80          | 0.7                 | IDC        | 2              | 1           | 0(0)                  | (-) | (-) | (+) | (+) | (-)  | 1    | 0          | 38.47                  | no                          |
| Breast tumor 201 | GSE45725             | GPL6883                | GSM1112940           | 4418463155_F     | FNA             | 8.4            | 49          | 0.02                | IDC        | 0.4            | 2           | 0(1)                  | (-) | (+) | (+) | (+) | (-)  | 1    | 0          | 48.30                  | yes                         |
| Breast tumor 202 | GSE45725             | GPL6883                | GSM1112941           | 4418463155_G     | FNA             | 7.1            | 42          | 0.06                | IDC        | 1.1            | 2           | 2(3)                  | (+) | (-) | (+) | (+) | (-)  | 2    | 0          | 47.67                  | yes                         |
| Breast tumor 203 | GSE45725             | GPL6883                | GSM1112942           | 4418463155_H     | FNA             | 7.8            | 54          | 0.56                | DCIS/IDC   | 0.1            | NA          | 0(0)                  | (-) | NA  | (-) | (-) | NA   | 3    | 0          | 47.90                  | no                          |
| Breast tumor 204 | GSE45725             | GPL6883                | GSM1112943           | 4418463227_A     | FNA             | 6.8            | 57          | 0.001               | DCIS/IDC   | <0.1           | NA          | NA                    | NA  | NA  | NA  | NA  | NA   | 3    | 0          | 34.37                  | no                          |
| Breast tumor 205 | GSE45725             | GPL6883                | GSM1112944           | 4418463227_B     | FNA             | 8.9            | 50          | 0.5                 | IDC        | 2.6            | 3           | 3(16)                 | (+) | (-) | (+) | (-) | (-)  | 2    | 0          | 26.23                  | yes                         |
| Breast tumor 206 | GSE45725             | GPL6883                | GSM1112945           | 4418463227_C     | FNA             | 8.5            | 46          | 0.25                | IDC        | 1.6            | 1           | 0(2)                  | (-) | (+) | (+) | (-) | (-)  | 2    | 0          | 40.87                  | yes                         |
| Breast tumor 207 | GSE45725             | GPL6883                | GSM1112946           | 4418463227_D     | FNA             | 6.9            | 54          | 0.53                | IDC        | 3.6            | 2           | 0(11)                 | (-) | (+) | (-) | (-) | (-)  | 3    | 0          | 46.67                  | yes                         |
| Breast tumor 208 | GSE45725             | GPL6883                | GSM1112947           | 4418463227_E     | FNA             | 8.6            | 50          | 0                   | IDC        | 3.7            | 2           | 0(2)                  | (-) | (+) | (+) | (+) | (-)  | 1    | 0          | 37.60                  | yes                         |
| Breast tumor 209 | GSE45725             | GPL6883                | GSM1112948           | 4418463227_F     | FNA             | 6.6            | 45          | NA                  | FEA        | NA             | NA          | NA                    | NA  | NA  | NA  | NA  | NA   | 1    | 0          | 38.30                  | no                          |
| Breast tumor 210 | GSE45725             | GPL6883                | GSM1112949           | 4418463227_G     | FNA             | 6.9            | 58          | 0.36                | IDC        | 0.29           | 2           | 0(6)                  | (-) | NA  | (+) | (+) | (+)  | 3    | 0          | 45.57                  | yes                         |
| Breast tumor 211 | GSE45725             | GPL6883                | GSM1112950           | 4418463227_H     | FNA             | 6.9            | 56          | 0.7                 | IDC        | 1.4            | 3           | 0(3)                  | (-) | (-) | (-) | (-) | (+)  | 3    | 0          | 44.60                  | yes                         |
| Breast tumor 212 | GSE45725             | GPL6883                | GSM1112951           | 4482545010_B     | FNA             | 6.5            | 32          | 0.01                | DCIS/IDC   | 13             | 2           | 4(5)                  | (-) | (-) | (-) | (-) | (+)  | 3    | 0          | 46.37                  | no                          |
| Breast tumor 213 | GSE45725             | GPL6883                | GSM1112952           | 4482545010_C     | FNA             | 7.2            | 51          | 0.6                 | IDC        | 4.4            | 2           | 2(16)                 | (-) | (-) | (+) | (+) | (-)  | 1    | 0          | 38.30                  | yes                         |
| Breast tumor 214 | GSE45725             | GPL6883                | GSM1112953           | 4482545010_D     | FNA             | 8.5            | 48          | 1.1                 | IDC        | 3.8            | 3           | 0(9)                  | (-) | (-) | (+) | (+) | (+)  | 2    | 0          | 35.27                  | yes                         |
| Breast tumor 215 | GSE45725             | GPL6883                | GSM1112954           | 4482545010_E     | FNA             | 7              | 69          | 0.024               | IDC        | 2.3            | 3           | 0(2)                  | (-) | (-) | (+) | (-) | (+)  | 3    | 1          | 14.50                  | yes                         |
| Breast tumor 216 | GSE45725             | GPL6883                | GSM1112955           | 4482545010_F     | FNA             | 7.9            | 43          | 0.5                 | IDC        | 2.5            | 3           | 0(5)                  | (-) | (-) | (+) | (-) | (+)  | 3    | 1          | 25.50                  | yes                         |
| Breast tumor 217 | GSE45725             | GPL6883                | GSM1112956           | 4482545010_G     | FNA             | 7.8            | 46          | 0.4                 | IDC        | 1.8            | 2           | 0(2)                  | (-) | (-) | (+) | (+) | (-)  | 2    | 0          | 46.60                  | yes                         |
| Breast tumor 218 | GSE45725             | GPL6883                | GSM1112957           | 4482545010_H     | FNA             | 7.7            | 74          | 0.1                 | IDC        | 2.7            | 2           | 0(0)                  | (-) | (-) | (+) | (+) | (-)  | 2    | 0          | 6.60                   | yes                         |
| Breast tumor 219 | GSE45725             | GPL6883                | GSM1112958           | 4482545111_A     | FNA             | 9.4            | 55          | 1.8                 | IDC        | 1.9            | 2           | 2(15)                 | (-) | (-) | (+) | (+) | (-)  | 1    | 0          | 1.37                   | no                          |
| Breast tumor 220 | GSE45725             | GPL6883                | GSM1112959           | 4482545111_B     | FNA             | 8              | 92          | 0.1                 | IDC        | 3.4            | 2           | 4(13)                 | (+) | (+) | (+) | (+) | (-)  | 2    | 1          | 39.23                  | yes                         |
| Breast tumor 221 | GSE45725             | GPL6883                | GSM1112960           | 4482545111_C     | FNA             | 7.7            | 78          | 0.4                 | IDC        | 1.4            | 2           | 0(4)                  | (-) | (-) | (+) | (+) | (-)  | 1    | 0          | 44.43                  | yes                         |
| Breast tumor 222 | GSE45725             | GPL6883                | GSM1112961           | 4482545111_D     | FNA             | 9              | 37          | 0.01                | IDC        | 1.5            | 3           | 0(18)                 | (+) | (+) | (+) | (+) | (+)  | 2    | 0          | 45.30                  | yes                         |
| Breast tumor 223 | GSE45725             | GPL6883                | GSM1112962           | 4482545111_E     | FNA             | 6.5            | 73          | 0.6                 | IDC        | 1.6            | 3           | 0(2)                  | (+) | (-) | (-) | (-) | (+)  | 3    | 0          | 46.63                  | yes                         |
| Breast tumor 224 | GSE45725             | GPL6883                | GSM1112963           | 4482545111_F     | FNA             | 7              | 49          | 0.1                 | IDC        | 1.7            | 3           | 0(6)                  | (+) | (-) | (+) | (+) | (-)  | 1    | 0          | 45.47                  | yes                         |
| Breast tumor 225 | GSE45725             | GPL6883                | GSM1112964           | 4482545111_G     | FNA             | 6.6            | 58          | 0.71                | DCIS/IDC   | 0.09           | NA          | 1(3)                  | (-) | (-) | NA  | NA  | NA   | 3    | 0          | 40.33                  | no                          |
| Breast tumor 226 | GSE45725             | GPL6883                | GSM1112965           | 4482545111_H     | FNA             | 7.4            | 64          | 0.16                | IDC        | 1.5            | 2           | 0(4)                  | (-) | (-) | (+) | (+) | (-)  | 2    | 0          | 16.07                  | yes                         |
| Breast tumor 227 | GSE45725             | GPL6883                | GSM1112966           | 4801489005_C     | FNA             | 6.4            | 73          | 0.52                | IDC        | 1.4            | 3           | 0(2)                  | (+) | (-) | (-) | (-) | (-)  | 3    | 1          | 15.40                  | yes                         |
| Breast tumor 228 | GSE45725             | GPL6883                | GSM1112967           | 4801489005_D     | FNA             | 5.8            | 65          | 0.25                | IDC        | 2.4            | 3           | 2(13)                 | (+) | (-) | (-) | (-) | (-)  | 3    | NA         | NA                     | no                          |
| Breast tumor 229 | GSE45725             | GPL6883                | GSM1112968           | 4801489005_E     | FNA             | 8.7            | 67          | 0.61                | IDC        | 3.8            | 1           | 0(18)                 | (+) | (-) | (+) | (+) | (-)  | 1    | 0          | 44.13                  | yes                         |
| Breast tumor 230 | GSE45725             | GPL6883                | GSM1112969           | 4801489005_F     | FNA             | 9.1            | 45          | 0.1                 | IDC        | 1.3            | 3           | 0(1)                  | (-) | (-) | (+) | (+) | (-)  | 3    | 0          | 39.07                  | yes                         |
| Breast tumor 231 | GSE45725             | GPL6883                | GSM1112970           | 4801489005_G     | FNA             | 6.2            | 49          | 1.1                 | DCIS/IDC   | 0.1            | NA          | 0(4)                  | (-) | (+) | (+) | (-) | NA   | 3    | 0          | 39.50                  | no                          |
| Breast tumor 232 | GSE45725             | GPL6883                | GSM1112971           | 4801489005_H     | FNA             | 8.2            | 65          | 0.2                 | IDC        | 0.7            | 2           | 0(3)                  | (-) | (+) | (+) | (+) | (-)  | 3    | 0          | 40.40                  | yes                         |
| Breast tumor 233 | GSE45725             | GPL6883                | GSM1112972           | 4801489010_A     | FNA             | 9.3            | 41          | 0.01                | IDC        | 1.6            | 3           | 0(3)                  | (-) | (-) | (+) | (+) | (+)  | 2    | 0          | 43.33                  | yes                         |

| Sample_title     | GEO_series_accession | GEO_platform_accession | GEO_sample_accession | GEO_raw_data/rep | Sample_type/rep | Sample_RIN/rep | Patient_age | Surgical_margin(cm) | Tumor_type | Tumor_size(cm) | Tumor_grade | Positive_LN(total_LN) | LVI | EIC | ER  | PR  | HER2 | CMTC | Recurrence | Recurrence-free_months | Used_in_the_431B_C_dataset? |
|------------------|----------------------|------------------------|----------------------|------------------|-----------------|----------------|-------------|---------------------|------------|----------------|-------------|-----------------------|-----|-----|-----|-----|------|------|------------|------------------------|-----------------------------|
| Breast tumor 234 | GSE45725             | GPL6883                | GSM1112973           | 4801489010_B     | FNA             | 8.6            | 53          | 0.8                 | IDC        | 2.3            | 3           | 0(4)                  | (+) | (-) | (+) | (+) | (-)  | 1    | 0          | 40.23                  | yes                         |
| Breast tumor 235 | GSE45725             | GPL6883                | GSM1112974           | 4801489010_C     | FNA             | 5.9            | 47          | 0.05                | IDC        | 1.2            | 1           | 0(4)                  | (-) | (-) | (+) | (+) | (-)  | 1    | 0          | 40.20                  | yes                         |
| Breast tumor 236 | GSE45725             | GPL6883                | GSM1112975           | 4801489010_D     | FNA             | 7.2            | 45          | 1.1                 | IDC        | 1.6            | 2           | 0(5)                  | (-) | (-) | (+) | (+) | (-)  | 1    | 1          | 35.00                  | yes                         |
| Breast tumor 237 | GSE45725             | GPL6883                | GSM1112976           | 4801489010_E     | FNA             | 7.5            | 55          | 0.5                 | IDC        | 4.5            | 3           | 3(4)                  | (+) | (+) | (+) | (+) | (-)  | 1    | 0          | 36.77                  | yes                         |
| Breast tumor 238 | GSE45725             | GPL6883                | GSM1112977           | 4801489010_F     | FNA             | 4.7            | 34          | NA                  | DCIS       | NA             | NA          | 0(7)                  | NA  | NA  | NA  | NA  | NA   | 2    | 0          | 42.30                  | no                          |
| Breast tumor 239 | GSE45725             | GPL6883                | GSM1112978           | 4801489010_G     | FNA             | 6.6            | 62          | 0.9                 | IDC        | 1.6            | 3           | 1(21)                 | (+) | (+) | (-) | (-) | (-)  | 3    | 1          | 34.17                  | yes                         |
| Breast tumor 240 | GSE45725             | GPL6883                | GSM1112979           | 4801489010_H     | FNA             | 7.4            | 39          | NA                  | DCIS       | NA             | NA          | 0(2)                  | NA  | NA  | NA  | NA  | NA   | 1    | 0          | 37.10                  | no                          |
| Breast tumor 241 | GSE45725             | GPL6883                | GSM1112980           | 4801489011_A     | FNA             | 7.2            | 44          | 0.1                 | IDC        | 1.9            | 2           | 0(1)                  | (+) | (+) | (+) | (+) | (+)  | 2    | 0          | 41.30                  | yes                         |
| Breast tumor 242 | GSE45725             | GPL6883                | GSM1112981           | 4801489011_B     | FNA             | 7.2            | 68          | 2.1                 | IDC        | 2              | 2           | 4(17)                 | (-) | (-) | (+) | (+) | (-)  | 2    | 0          | 30.73                  | yes                         |
| Breast tumor 243 | GSE45725             | GPL6883                | GSM1112982           | 4801489011_C     | FNA             | 7.7            | 31          | 0.01                | IDC        | 3.1            | 3           | 2(14)                 | (+) | (-) | (+) | (+) | (-)  | 2    | 0          | 43.00                  | yes                         |
| Breast tumor 244 | GSE45725             | GPL6883                | GSM1112983           | 4801489011_D     | FNA             | 7.8            | 42          | 0.2                 | IDC        | 2.6            | 2           | 0(3)                  | (-) | (-) | (+) | (+) | (-)  | 1    | 0          | 35.40                  | yes                         |
| Breast tumor 245 | GSE45725             | GPL6883                | GSM1112984           | 4801489011_E     | FNA             | 7.3            | 66          | 0.34                | IDC        | 1.2            | 2           | 0(3)                  | (+) | (-) | (+) | (+) | (-)  | 1    | 0          | 39.40                  | yes                         |
| Breast tumor 246 | GSE45725             | GPL6883                | GSM1112985           | 4801489011_F     | FNA             | 7              | 49          | 1.5                 | IDC        | 1.9            | 2           | 0(3)                  | (-) | (-) | (+) | (+) | (-)  | 1    | 0          | 40.87                  | yes                         |
| Breast tumor 247 | GSE45725             | GPL6883                | GSM1112986           | 4801489011_G     | FNA             | 5.6            | 76          | 0.8                 | IDC        | 2.3            | 3           | 2(20)                 | (+) | (-) | (-) | (-) | (+)  | 3    | 0          | 35.37                  | yes                         |
| Breast tumor 248 | GSE45725             | GPL6883                | GSM1112987           | 4801489011_H     | FNA             | 7.5            | 50          | 1.3                 | IDC        | 0.8            | 2           | 0(4)                  | (-) | (+) | (+) | (+) | (-)  | 1    | 0          | 12.57                  | yes                         |
| Breast tumor 249 | GSE45725             | GPL6883                | GSM1112988           | 4801489012_A     | FNA             | 8.8            | 71          | 0.9                 | IDC        | 1.6            | 2           | 0(7)                  | (-) | (-) | (+) | (+) | (-)  | 2    | 0          | 1.47                   | no                          |
| Breast tumor 250 | GSE45725             | GPL6883                | GSM1112989           | 4801489012_B     | FNA             | 7.2            | 49          | 0.12                | IDC        | 1.8            | 2           | 0(5)                  | (-) | (-) | (+) | (+) | (-)  | 1    | 0          | 40.83                  | yes                         |
| Breast tumor 251 | GSE45725             | GPL6883                | GSM1112990           | 4801489012_C     | FNA             | 8.7            | 48          | 0.7                 | IDC        | 0.9            | 1           | 0(3)                  | (-) | (-) | (+) | (+) | (-)  | 1    | 0          | 33.53                  | yes                         |
| Breast tumor 252 | GSE45725             | GPL6883                | GSM1112991           | 4801489012_D     | FNA             | 6.3            | 65          | 0.9                 | IDC        | 0.8            | 2           | 0(1)                  | (-) | (-) | (+) | (-) | (-)  | 1    | 0          | 40.17                  | yes                         |
| Breast tumor 253 | GSE45725             | GPL6883                | GSM1112992           | 4801489012_E     | FNA             | 5.6            | 47          | 0.05                | IDC        | 1.5            | 3           | 0(4)                  | (-) | (-) | (-) | (-) | (-)  | 3    | 0          | 41.37                  | yes                         |
| Breast tumor 254 | GSE45725             | GPL6883                | GSM1112993           | 4801489012_F     | FNA             | 9.1            | 78          | 0.06                | IDC        | 1.7            | 2           | 0(1)                  | (-) | (-) | (+) | (+) | (-)  | 1    | 0          | 32.93                  | yes                         |
| Breast tumor 255 | GSE45725             | GPL6883                | GSM1112994           | 4801489012_G     | FNA             | 8.4            | 71          | 0.7                 | IDC        | 1.9            | 3           | 0(3)                  | (-) | (-) | (+) | (+) | (-)  | 2    | 0          | 40.33                  | yes                         |
| Breast tumor 256 | GSE45725             | GPL6883                | GSM1112995           | 4801489012_H     | FNA             | 6.1            | 71          | 1                   | IDC        | 1.2            | 3           | 0(2)                  | (-) | (-) | (+) | (-) | (-)  | 1    | 0          | 42.10                  | yes                         |
| Breast tumor 257 | GSE45725             | GPL6883                | GSM1112996           | 4801489038_A     | FNA             | 7.2            | 55          | 1.6                 | IDC        | 1.7            | 3           | 14(21)                | (+) | (-) | (+) | (-) | (+)  | 3    | 0          | 41.23                  | yes                         |
| Breast tumor 258 | GSE45725             | GPL6883                | GSM1112997           | 4801489038_B     | FNA             | NA             | NA          | 0.6                 | IDC        | 1.9            | 1           | 0(2)                  | (-) | (-) | (+) | (+) | (-)  | 1    | 0          | 41.33                  | no                          |
| Breast tumor 259 | GSE45725             | GPL6883                | GSM1112998           | 4801489038_C     | FNA             | 7.1            | 56          | 0.3                 | IDC        | 3.7            | 2           | 0(1)                  | (+) | (-) | (+) | (-) | (-)  | 2    | 0          | 38.87                  | yes                         |
| Breast tumor 260 | GSE45725             | GPL6883                | GSM1112999           | 4801489038_D     | FNA             | NA             | 85          | 0.6                 | IDC        | 3.4            | 2           | 0(1)                  | (-) | (+) | (+) | (+) | (-)  | 3    | 0          | 31.67                  | no                          |
| Breast tumor 261 | GSE45725             | GPL6883                | GSM1113000           | 4801489038_E     | FNA             | 7.5            | 82          | 0.7                 | IDC        | 3.2            | 1           | 0(0)                  | (-) | (+) | (+) | (+) | (-)  | 2    | 0          | 41.47                  | yes                         |
| Breast tumor 262 | GSE45725             | GPL6883                | GSM1113001           | 4801489038_F     | FNA             | 8              | 54          | 1.1                 | IDC        | 2.9            | 3           | 0(12)                 | (+) | (-) | (-) | (-) | (+)  | 3    | 0          | 40.40                  | yes                         |
| Breast tumor 263 | GSE45725             | GPL6883                | GSM1113002           | 4801489038_G     | FNA             | 7.7            | 39          | 0.2                 | IDC        | 2.4            | 3           | 0(2)                  | (-) | (-) | (-) | (-) | (-)  | 3    | 1          | 14.10                  | yes                         |
| Breast tumor 264 | GSE45725             | GPL6883                | GSM1113003           | 4801489038_H     | FNA             | 8.9            | 57          | 0.08                | IDC        | 2.9            | 2           | 0(4)                  | (+) | (-) | (-) | (-) | (-)  | 3    | 0          | 37.40                  | yes                         |
| Breast tumor 265 | GSE45725             | GPL6883                | GSM1113004           | 4801489039_A     | FNA             | 7.2            | 45          | 0.1                 | IDC        | 2.4            | 3           | 0(2)                  | (-) | (-) | (+) | (+) | (+)  | 2    | 0          | 39.27                  | yes                         |
| Breast tumor 266 | GSE45725             | GPL6883                | GSM1113005           | 4801489039_B     | FNA             | 6.5            | 80          | 0.5                 | IDC        | 4.2            | 2           | 10(14)                | (+) | (-) | (+) | (-) | (+)  | 3    | 0          | 25.47                  | yes                         |
| Breast tumor 267 | GSE45725             | GPL6883                | GSM1113006           | 4801489039_C     | FNA             | 8.8            | 64          | 0.8                 | IDC        | 2.3            | 3           | 5(21)                 | (+) | (-) | (-) | (-) | (+)  | 3    | 0          | 40.83                  | yes                         |
| Breast tumor 268 | GSE45725             | GPL6883                | GSM1113007           | 4801489039_D     | FNA             | 9.1            | 39          | 0.12                | IDC        | 1.2            | 3           | 0(15)                 | (+) | (-) | (+) | (+) | (-)  | 2    | 0          | 39.70                  | yes                         |
| Breast tumor 269 | GSE45725             | GPL6883                | GSM1113008           | 4801489039_E     | FNA             | 8.8            | 55          | 0.04                | IDC        | 2              | 3           | 31(39)                | (+) | (-) | (+) | (+) | (-)  | 2    | 0          | 38.73                  | yes                         |
| Breast tumor 270 | GSE45725             | GPL6883                | GSM1113009           | 4801489039_F     | FNA             | 9              | 53          | 0.64                | IDC        | 2.7            | 3           | 1(17)                 | (+) | (-) | (-) | (-) | (-)  | 3    | 0          | 39.50                  | yes                         |
| Breast tumor 271 | GSE45725             | GPL6883                | GSM1113010           | 4801489039_G     | FNA             | 9.3            | 45          | 0.24                | IDC        | 2.7            | 2           | 0(1)                  | (-) | (-) | (+) | (+) | (-)  | 1    | 0          | 38.50                  | yes                         |
| Breast tumor 272 | GSE45725             | GPL6883                | GSM1113011           | 4801489039_H     | FNA             | 7.3            | 67          | 0.2                 | IDC        | 3.2            | 3           | 1(24)                 | (+) | (-) | (+) | (+) | (-)  | 2    | 1          | 12.40                  | yes                         |
| Breast tumor 273 | GSE45725             | GPL6883                | GSM1113012           | 4849554001_A     | FNA             | 8.5            | 74          | 0.4                 | IDC        | 1.6            | 1           | 1(3)                  | (-) | (-) | (+) | (+) | (-)  | 1    | 0          | 38.73                  | yes                         |
| Breast tumor 274 | GSE45725             | GPL6883                | GSM1113013           | 4849554001_B     | FNA             | 8.8            | 63          | 0.3                 | IDC        | 1.8            | 2           | 0(2)                  | (-) | (-) | (+) | (+) | (-)  | 1    | 0          | 35.00                  | yes                         |
| Breast tumor 275 | GSE45725             | GPL6883                | GSM1113014           | 4849554001_C     | FNA             | 8.6            | 71          | 0.4                 | IDC        | 0.8            | 2           | 0(2)                  | (-) | (-) | (+) | (+) | (-)  | 1    | 0          | 32.13                  | yes                         |
| Breast tumor 276 | GSE45725             | GPL6883                | GSM1113015           | 4849554001_D     | FNA             | 7.3            | 60          | 0.3                 | IDC        | 1.6            | 3           | 0(5)                  | (+) | (-) | (-) | (-) | (-)  | 3    | 0          | 38.23                  | yes                         |
| Breast tumor 277 | GSE45725             | GPL6883                | GSM1113016           | 4849554001_E     | FNA             | 8.8            | 78          | 0.6                 | IDC        | 4.1            | 3           | 0(3)                  | (+) | (-) | (-) | (-) | (-)  | 3    | 0          | 24.47                  | yes                         |
| Breast tumor 278 | GSE45725             | GPL6883                | GSM1113017           | 4849554001_G     | FNA             | 8.4            | 50          | 0.6                 | IDC        | 3.3            | 3           | 5(17)                 | (+) | (-) | (+) | (+) | (-)  | 1    | 0          | 38.57                  | yes                         |
| Breast tumor 279 | GSE45725             | GPL6883                | GSM1113018           | 4849554001_H     | FNA             | 7.2            | 80          | 0.07                | ILC        | 3.2            | 1           | 0(5)                  | (-) | (-) | (+) | (+) | (-)  | 2    | 0          | 24.77                  | yes                         |
| Breast tumor 280 | GSE45725             | GPL6883                | GSM1113019           | 4849554002_A     | FNA             | 8.3            | 75          | 0.9                 | IDC        | 0.8            | 3           | 0(3)                  | (-) | (-) | (+) | (+) | (-)  | 1    | 0          | 36.40                  | yes                         |



| Sample_title     | GEO_series_accession | GEO_platform_accession | GEO_sample_accession | GEO_raw_data/rep | Sample_type/rep | Sample_RIN/rep | Patient_age | Surgical_margin(cm) | Tumor_type | Tumor_size(cm) | Tumor_grade | Positive_LN(total_LN) | LVI | EIC | ER  | PR  | HER2 | CMTc | Recurrence | Recurrence-free_months | Used_in_the_431B_C_dataset? |
|------------------|----------------------|------------------------|----------------------|------------------|-----------------|----------------|-------------|---------------------|------------|----------------|-------------|-----------------------|-----|-----|-----|-----|------|------|------------|------------------------|-----------------------------|
| Breast tumor 281 | GSE45725             | GPL6883                | GSM1113020           | 4849554002_B     | FNA             | 9.3            | 83          | 0.6                 | IDC        | 1.5            | 3           | 0(0)                  | (-) | (-) | (+) | (-) | (-)  | 3    | 1          | 19.63                  | yes                         |
| Breast tumor 282 | GSE45725             | GPL6883                | GSM1113021           | 4849554002_C     | FNA             | 7.5            | 59          | 0                   | IDC        | 1.7            | 3           | 0(2)                  | (+) | (-) | (+) | (+) | (-)  | 1    | 0          | 7.80                   | yes                         |
| Breast tumor 283 | GSE45725             | GPL6883                | GSM1113022           | 4849554002_D     | FNA             | 7.6            | 67          | 0.04                | ILC        | 1.8            | 3           | 0(5)                  | (+) | (-) | (+) | (+) | (-)  | 2    | 0          | 34.70                  | yes                         |
| Breast tumor 284 | GSE45725             | GPL6883                | GSM1113023           | 4849554002_E     | FNA             | 8.2            | 59          | 0.5                 | IDC        | 2.1            | 3           | 0(1)                  | (-) | (-) | (-) | (-) | (+)  | 3    | 0          | 38.33                  | yes                         |
| Breast tumor 285 | GSE45725             | GPL6883                | GSM1113024           | 4849554002_F     | FNA             | 7.7            | 54          | 1.3                 | IDC        | 3.6            | 3           | 9(14)                 | (-) | (+) | (+) | (-) | (-)  | 3    | 0          | 36.90                  | yes                         |
| Breast tumor 286 | GSE45725             | GPL6883                | GSM1113025           | 4849554002_G     | FNA             | 9.1            | 73          | 0                   | IDC        | 1.4            | 2           | 0(2)                  | (-) | (-) | (+) | (+) | (-)  | 1    | 0          | 38.60                  | yes                         |
| Breast tumor 287 | GSE45725             | GPL6883                | GSM1113026           | 4849554002_H     | FNA             | 8.2            | 89          | 0.26                | IMC        | 1.4            | 3           | 0(1)                  | (+) | (-) | (+) | (+) | (-)  | 2    | 0          | 35.70                  | yes                         |
| Breast tumor 288 | GSE45725             | GPL6883                | GSM1113027           | 4849554003_A     | FNA             | 8.8            | 44          | 0.28                | IDC        | 2.5            | 3           | 0(3)                  | (+) | (-) | (+) | (+) | (+)  | 2    | 0          | 38.57                  | yes                         |
| Breast tumor 289 | GSE45725             | GPL6883                | GSM1113028           | 4849554003_B     | FNA             | 9.6            | 62          | 0.59                | IDC        | 0.8            | 2           | 0(2)                  | (-) | (+) | (+) | (+) | (-)  | 2    | 0          | 37.73                  | yes                         |
| Breast tumor 290 | GSE45725             | GPL6883                | GSM1113029           | 4849554003_C     | FNA             | 6.6            | 77          | 0.07                | IDC        | 4              | 3           | 3(17)                 | (+) | (-) | (+) | (+) | (+)  | 2    | 0          | 6.30                   | yes                         |
| Breast tumor 291 | GSE45725             | GPL6883                | GSM1113030           | 4849554003_D     | FNA             | 8              | 36          | 0.6                 | IDC        | 2.4            | 3           | 0(4)                  | (+) | (-) | (-) | (-) | (+)  | 3    | 0          | 38.30                  | yes                         |
| Breast tumor 292 | GSE45725             | GPL6883                | GSM1113031           | 4849554003_E     | FNA             | 7.5            | 43          | 0                   | IDC        | 1.3            | 2           | 0(4)                  | (-) | (-) | (+) | (+) | (-)  | 2    | 0          | 32.13                  | yes                         |
| Breast tumor 293 | GSE45725             | GPL6883                | GSM1113032           | 4849554003_F     | FNA             | 8.7            | 75          | 1.1                 | IDC        | 2.9            | 3           | 0(6)                  | (-) | (-) | (+) | (+) | (-)  | 2    | NA         | NA                     | no                          |
| Breast tumor 294 | GSE45725             | GPL6883                | GSM1113033           | 4849554003_G     | FNA             | 8.7            | 44          | 0                   | IDC        | 3.5            | 1           | 4(26)                 | (-) | (-) | (+) | (+) | (-)  | 1    | 0          | 36.30                  | yes                         |
| Breast tumor 295 | GSE45725             | GPL6883                | GSM1113034           | 4849554003_H     | FNA             | 7.7            | 51          | 1.1                 | IDC        | 2.2            | 3           | 1(24)                 | (+) | (-) | (+) | (+) | (-)  | 2    | 0          | 35.47                  | yes                         |
| Breast tumor 296 | GSE45725             | GPL6883                | GSM1113035           | 4849554043_A     | FNA             | 6.2            | 49          | 0.6                 | IMC        | 2              | 2           | 0(1)                  | (-) | (-) | (+) | (+) | (-)  | 2    | 0          | 38.57                  | yes                         |
| Breast tumor 297 | GSE45725             | GPL6883                | GSM1113036           | 4849554043_C     | FNA             | 8.9            | 69          | 1.3                 | IDC        | 3              | 3           | 0(5)                  | (+) | (-) | (+) | (-) | (+)  | 2    | 0          | 15.53                  | yes                         |
| Breast tumor 298 | GSE45725             | GPL6883                | GSM1113037           | 4849554043_D     | FNA             | 9.5            | 57          | 0.16                | IDC        | 2.2            | 3           | 0(2)                  | (-) | (-) | (+) | (+) | (-)  | 2    | 0          | 33.07                  | yes                         |
| Breast tumor 299 | GSE45725             | GPL6883                | GSM1113038           | 4849554043_E     | FNA             | 8.1            | 51          | 0.5                 | IMC        | 2.2            | 2           | 0(2)                  | (-) | (-) | (+) | (+) | (+)  | 1    | 0          | 38.07                  | yes                         |
| Breast tumor 300 | GSE45725             | GPL6883                | GSM1113039           | 4849554043_F     | FNA             | 7.2            | 64          | 0.7                 | IDC        | 2.4            | 3           | 0(3)                  | (-) | (-) | (-) | (-) | (-)  | 3    | 0          | 24.17                  | yes                         |
| Breast tumor 301 | GSE45725             | GPL6883                | GSM1113040           | 4849554043_G     | FNA             | 8.3            | 62          | 0.6                 | IDC        | 1.6            | 2           | 1(15)                 | (+) | (-) | (+) | (-) | (-)  | 1    | 0          | 37.77                  | yes                         |
| Breast tumor 302 | GSE45725             | GPL6883                | GSM1113041           | 4849554043_H     | FNA             | 8              | 40          | 0.5                 | IDC        | 2.8            | 3           | 2(16)                 | (+) | (-) | (+) | (-) | (-)  | 2    | 0          | 37.57                  | yes                         |
| Breast tumor 303 | GSE45725             | GPL6883                | GSM1113042           | 4849554044_A     | FNA             | 6.8            | 59          | 0.2                 | IDC        | 2.1            | 2           | 1(28)                 | (-) | (+) | (-) | (-) | (+)  | 3    | 0          | 17.07                  | yes                         |
| Breast tumor 304 | GSE45725             | GPL6883                | GSM1113043           | 4849554044_B     | FNA             | 8.5            | 45          | 0.033               | IDC        | 2.4            | 2           | 0(8)                  | (-) | (-) | (+) | (+) | (-)  | 1    | 0          | 36.50                  | yes                         |
| Breast tumor 305 | GSE45725             | GPL6883                | GSM1113044           | 4849554044_C     | FNA             | 8.8            | 49          | 0.13                | IDC        | 2.1            | 2           | 0(4)                  | (+) | (-) | (+) | (+) | (-)  | 2    | 0          | 37.63                  | yes                         |
| Breast tumor 306 | GSE45725             | GPL6883                | GSM1113045           | 4849554044_E     | FNA             | 9.2            | 44          | 0.2                 | IDC        | 2.6            | 3           | 2(4)                  | (-) | (-) | (-) | (-) | (+)  | 3    | 0          | 40.03                  | yes                         |
| Breast tumor 307 | GSE45725             | GPL6883                | GSM1113046           | 4849554044_F     | FNA             | 7.8            | 65          | 0.6                 | IDC        | 2.2            | 2           | 0(4)                  | (-) | (+) | (+) | (+) | (-)  | 2    | 0          | 42.10                  | yes                         |
| Breast tumor 308 | GSE45725             | GPL6883                | GSM1113047           | 4849554044_G     | FNA             | 8.3            | 87          | 0.5                 | IDC        | 3.2            | 3           | 0(0)                  | (+) | (-) | (+) | (+) | (-)  | 2    | 1          | 16.20                  | yes                         |
| Breast tumor 309 | GSE45725             | GPL6883                | GSM1113048           | 4849554044_H     | FNA             | 8.2            | 72          | 0.5                 | IDC        | 2.1            | 2           | 0(1)                  | (-) | (+) | (+) | (+) | (-)  | 2    | 0          | 32.80                  | yes                         |
| Breast tumor 310 | GSE45725             | GPL6883                | GSM1113049           | 4849554045_A     | FNA             | 6.5            | 60          | 0.175               | ILC        | 1.9            | 3           | 1(2)                  | (+) | (-) | (+) | (+) | (-)  | 2    | 0          | 34.07                  | yes                         |
| Breast tumor 311 | GSE45725             | GPL6883                | GSM1113050           | 4849554045_B     | FNA             | 8.5            | 76          | 1.6                 | IDC        | 3.2            | 2           | 1(14)                 | (+) | (-) | (+) | (+) | (-)  | 1    | 0          | 35.03                  | yes                         |
| Breast tumor 312 | GSE45725             | GPL6883                | GSM1113051           | 4849554045_C     | FNA             | 7.6            | 44          | 1.5                 | IDC        | 1.1            | 2           | 1(21)                 | (+) | (+) | (+) | (+) | (-)  | 1    | 0          | 34.53                  | yes                         |
| Breast tumor 313 | GSE45725             | GPL6883                | GSM1113052           | 4849554045_D     | FNA             | 8.9            | 55          | 0.22                | IDC        | 1.3            | 3           | 0(9)                  | (-) | (+) | (-) | (-) | (+)  | 3    | 0          | 35.93                  | yes                         |
| Breast tumor 314 | GSE45725             | GPL6883                | GSM1113053           | 4849554045_E     | FNA             | 8.4            | 44          | NA                  | ADH        | NA             | NA          | NA                    | NA  | NA  | NA  | NA  | NA   | 1    | 0          | 43.17                  | no                          |
| Breast tumor 315 | GSE45725             | GPL6883                | GSM1113054           | 4849554045_F     | FNA             | 9.4            | 39          | 0.7                 | IDC        | 3.7            | 3           | 1(23)                 | (+) | (-) | (+) | (-) | (-)  | 2    | 0          | 38.10                  | yes                         |
| Breast tumor 316 | GSE45725             | GPL6883                | GSM1113055           | 4849554045_G     | FNA             | 8              | 46          | 0                   | IDC        | 3              | 3           | 2(27)                 | (+) | (+) | (-) | (-) | (+)  | 3    | 1          | 36.07                  | yes                         |
| Breast tumor 317 | GSE45725             | GPL6883                | GSM1113056           | 4849554045_H     | FNA             | 7.7            | 44          | 3.2                 | IMC        | 4.7            | 2           | 2(17)                 | (+) | (-) | (+) | (+) | (-)  | 1    | 0          | 25.20                  | yes                         |
| Breast tumor 318 | GSE45725             | GPL6883                | GSM1113057           | 4807266013_B     | FNA             | 5.9            | 63          | 0.5                 | IDC        | 1.2            | 2           | 0(3)                  | (-) | (+) | (-) | (-) | (-)  | 3    | 0          | 39.40                  | yes                         |
| Breast tumor 319 | GSE45725             | GPL6883                | GSM1113058           | 4807266013_C     | FNA             | 5.6            | 48          | 0.2                 | IDC        | 4.5            | 3           | 0(1)                  | (+) | (-) | (-) | (-) | (-)  | 3    | 0          | 38.53                  | yes                         |
| Breast tumor 320 | GSE45725             | GPL6883                | GSM1113059           | 4807266013_D     | FNA             | 5.5            | 56          | 0.7                 | IDC        | 4.4            | 3           | 0(5)                  | (-) | (-) | (-) | (-) | (-)  | 3    | 0          | 36.27                  | yes                         |
| Breast tumor 321 | GSE45725             | GPL6883                | GSM1113060           | 4807266013_E     | FNA             | 1.5            | 42          | 0.15                | IDC        | 3              | 1           | 0(6)                  | (-) | (-) | (+) | (+) | (+)  | 1    | 0          | 32.37                  | no                          |
| Breast tumor 322 | GSE45725             | GPL6883                | GSM1113061           | 4807266013_F     | FNA             | 5.4            | 56          | 0.33                | IDC        | 1.5            | 3           | 0(5)                  | (-) | (-) | (+) | (-) | (+)  | 2    | 0          | 0.40                   | no                          |
| Breast tumor 323 | GSE45725             | GPL6883                | GSM1113062           | 4921085012_A     | FNA             | 9.7            | 60          | 0.3                 | IDC        | 1.8            | 3           | 0(5)                  | (+) | (-) | (+) | (+) | (-)  | 3    | 1          | 9.63                   | yes                         |
| Breast tumor 324 | GSE45725             | GPL6883                | GSM1113063           | 4921085012_B     | FNA             | 6.5            | 71          | 1.2                 | IDC        | 2.5            | 2           | 0(3)                  | (-) | (-) | (+) | (+) | (-)  | 1    | 0          | 33.67                  | yes                         |
| Breast tumor 325 | GSE45725             | GPL6883                | GSM1113064           | 4921085012_C     | FNA             | 8.9            | 53          | NA                  | IDC        | 1.6            | 2           | 0(2)                  | (-) | (-) | (+) | (+) | (-)  | 1    | 0          | 34.77                  | yes                         |
| Breast tumor 326 | GSE45725             | GPL6883                | GSM1113065           | 4921085012_D     | FNA             | 9.4            | 59          | 2                   | IDC        | 6.4            | 3           | 11(31)                | (+) | (-) | (+) | (+) | (+)  | 3    | 0          | 36.77                  | yes                         |
| Breast tumor 327 | GSE45725             | GPL6883                | GSM1113066           | 4921085012_E     | FNA             | 9.3            | 50          | 0.4                 | IDC        | 1.8            | 3           | 7(22)                 | (+) | (-) | (+) | (+) | (-)  | 1    | 0          | 36.00                  | yes                         |

| Sample_title     | GEO_series_accession | GEO_platform_accession | GEO_sample_accession | GEO_raw_data/rep | Sample_type/rep | Sample_RIN/rep | Patient_age | Surgical_margin(cm) | Tumor_type | Tumor_size(cm) | Tumor_grade | Positive_LN(total_LN) | LVI | EIC | ER  | PR  | HER2 | CMTc | Recurrence | Recurrence-free_months | Used_in_the_431B_C_dataset? |
|------------------|----------------------|------------------------|----------------------|------------------|-----------------|----------------|-------------|---------------------|------------|----------------|-------------|-----------------------|-----|-----|-----|-----|------|------|------------|------------------------|-----------------------------|
| Breast tumor 328 | GSE45725             | GPL6883                | GSM1113067           | 4921085012_F     | FNA             | 9              | 51          | 0.4                 | IDC        | 0.84           | 1           | 1(7)                  | (-) | (-) | (+) | (+) | (-)  | 1    | 0          | 36.00                  | yes                         |
| Breast tumor 329 | GSE45725             | GPL6883                | GSM1113068           | 4921085012_G     | FNA             | 9.4            | 45          | 0.3                 | IDC        | 1.7            | 3           | 0(3)                  | (+) | (-) | (+) | (-) | (-)  | 2    | 0          | 30.60                  | yes                         |
| Breast tumor 330 | GSE45725             | GPL6883                | GSM1113069           | 4921085012_H     | FNA             | 8.9            | 73          | 0.1                 | IDC        | 3.4            | 3           | 0(2)                  | (+) | (+) | (+) | (+) | (-)  | 2    | 0          | 28.23                  | yes                         |
| Breast tumor 331 | GSE45725             | GPL6883                | GSM1113070           | 4921106008_A     | FNA             | 8.9            | 52          | 0.2                 | IDC        | 1.5            | 3           | 17(29)                | (+) | (-) | (-) | (-) | (-)  | 3    | 0          | 34.93                  | yes                         |
| Breast tumor 332 | GSE45725             | GPL6883                | GSM1113071           | 4921106008_B     | FNA             | 5.7            | 57          | 0.5                 | IDC        | 2.6            | 3           | 0(3)                  | (+) | (-) | (-) | (-) | (-)  | 3    | 0          | 36.40                  | yes                         |
| Breast tumor 333 | GSE45725             | GPL6883                | GSM1113072           | 4921106008_C     | FNA             | 7              | 72          | 0.3                 | IDC        | 3              | 3           | 0(0)                  | (-) | (-) | (+) | (-) | (-)  | 3    | 1          | 4.53                   | no                          |
| Breast tumor 334 | GSE45725             | GPL6883                | GSM1113073           | 4921106008_D     | FNA             | 6.8            | 90          | NA                  | NA         | 1.90           | NA          | NA                    | NA  | NA  | (+) | (+) | (-)  | 1    | 0          | 10.00                  | no                          |
| Breast tumor 335 | GSE45725             | GPL6883                | GSM1113074           | 4921106008_E     | FNA             | 8.8            | 57          | 0.3                 | IDC        | 1.3            | 3           | 0(5)                  | (-) | (-) | (+) | (+) | (-)  | 2    | 0          | 35.30                  | yes                         |
| Breast tumor 336 | GSE45725             | GPL6883                | GSM1113075           | 4921106008_F     | FNA             | 8.8            | 50          | 0.05                | IDC        | 3.9            | 3           | 16(19)                | (+) | (+) | (-) | (-) | (+)  | 3    | 0          | 35.30                  | yes                         |
| Breast tumor 337 | GSE45725             | GPL6883                | GSM1113076           | 4921106008_G     | FNA             | 6.2            | 72          | 0.5                 | IDC        | 2.5            | 3           | 0(4)                  | (-) | (-) | (+) | (+) | (-)  | 3    | 0          | 23.27                  | yes                         |
| Breast tumor 338 | GSE45725             | GPL6883                | GSM1113077           | 4921106019_A     | FNA             | 6.4            | 54          | 0.6                 | IDC        | 4.1            | 2           | 0(3)                  | (-) | (-) | (+) | (+) | (-)  | 1    | 0          | 36.13                  | yes                         |
| Breast tumor 339 | GSE45725             | GPL6883                | GSM1113078           | 4921106019_B     | FNA             | 7.1            | 55          | NA                  | IDC        | 3.2            | 1           | 3(9)                  | (+) | (-) | (+) | (+) | (-)  | 1    | 0          | 6.50                   | yes                         |
| Breast tumor 340 | GSE45725             | GPL6883                | GSM1113079           | 4921106019_C     | FNA             | 7              | 60          | 0                   | DCIS       | 2.6            | NA          | 0(9)                  | (-) | (-) | NA  | NA  | NA   | 3    | 0          | 27.77                  | no                          |
| Breast tumor 341 | GSE45725             | GPL6883                | GSM1113080           | 4921106019_D     | FNA             | 9.1            | 70          | 0.2                 | DCIS       | 1.3            | NA          | 0(0)                  | (-) | (-) | NA  | NA  | NA   | 1    | 0          | 28.93                  | no                          |
| Breast tumor 342 | GSE45725             | GPL6883                | GSM1113081           | 4921106019_E     | FNA             | 7.7            | 54          | 0.6                 | IDC        | 2.4            | 2           | 6(24)                 | (-) | (+) | (+) | (+) | (-)  | 2    | 0          | 35.47                  | yes                         |
| Breast tumor 343 | GSE45725             | GPL6883                | GSM1113082           | 4921106019_F     | FNA             | 7.4            | 59          | 0.1                 | IDC        | 1.6            | 3           | 0(2)                  | (-) | (-) | (-) | (-) | (+)  | 3    | 0          | 34.40                  | yes                         |
| Breast tumor 344 | GSE45725             | GPL6883                | GSM1113083           | 4921106019_G     | FNA             | 8.3            | 66          | 0.5                 | IDC        | 2.5            | 3           | 14(24)                | (+) | (-) | (+) | (+) | (+)  | 2    | 1          | 33.70                  | yes                         |
| Breast tumor 345 | GSE45725             | GPL6883                | GSM1113084           | 4921106019_H     | FNA             | 7.3            | 52          | 0                   | ILC        | 2.8            | 2           | 0(3)                  | (-) | (-) | (+) | (+) | (-)  | 1    | 0          | 24.57                  | yes                         |
| Breast tumor 346 | GSE45725             | GPL6883                | GSM1113085           | 4921106020_A     | FNA             | 7.9            | 85          | 0.9                 | IDC        | 1.2            | 2           | 0(3)                  | (-) | (-) | (+) | (+) | (-)  | 1    | 0          | 2.00                   | no                          |
| Breast tumor 347 | GSE45725             | GPL6883                | GSM1113086           | 4921106020_B     | FNA             | 8.8            | 61          | 0                   | IDC        | 0.4            | 1           | 0(0)                  | (-) | (-) | (+) | (+) | (-)  | 3    | 0          | 31.40                  | yes                         |
| Breast tumor 348 | GSE45725             | GPL6883                | GSM1113087           | 4921106020_D     | FNA             | 8.2            | 72          | 0.4                 | IDC        | 2.2            | 3           | 0(3)                  | (-) | (-) | (-) | (-) | (+)  | 3    | 0          | 34.83                  | yes                         |
| Breast tumor 349 | GSE45725             | GPL6883                | GSM1113088           | 4921106020_E     | FNA             | 7.3            | 53          | 0.1                 | IDC        | 4.5            | 3           | 2(17)                 | (+) | (+) | (+) | (+) | (+)  | 2    | 0          | 35.77                  | yes                         |
| Breast tumor 350 | GSE45725             | GPL6883                | GSM1113089           | 4921106020_F     | FNA             | 7.1            | 48          | 0.3                 | ILC        | 3.6            | 2           | 2(16)                 | (-) | (-) | (+) | (+) | (-)  | 1    | 0          | 18.03                  | yes                         |
| Breast tumor 351 | GSE45725             | GPL6883                | GSM1113090           | 4921106020_G     | FNA             | 8.7            | 45          | 0.6                 | DCIS       | 0.8            | 2           | 0(0)                  | (-) | (-) | NA  | NA  | NA   | 1    | 0          | 27.83                  | no                          |
| Breast tumor 352 | GSE45725             | GPL6883                | GSM1113091           | 4921106020_H     | FNA             | 7.8            | 73          | 1                   | IDC        | 0.9            | 3           | 0(2)                  | (-) | (-) | (+) | (-) | (-)  | 2    | 0          | 34.63                  | yes                         |
| Breast tumor 353 | GSE45725             | GPL6883                | GSM1113092           | 4921106025_A     | FNA             | 7.4            | 55          | 0.2                 | IDC        | 1.1            | 2           | 0(5)                  | (+) | (-) | (+) | (-) | (-)  | 2    | 0          | 35.27                  | yes                         |
| Breast tumor 354 | GSE45725             | GPL6883                | GSM1113093           | 4921106025_B     | FNA             | 7.2            | 46          | 1                   | DCIS/IDC   | 0.06           | NA          | 0(4)                  | (-) | (-) | NA  | NA  | NA   | 1    | 0          | 20.10                  | no                          |
| Breast tumor 355 | GSE45725             | GPL6883                | GSM1113094           | 4921106025_C     | FNA             | 8              | 79          | 1.3                 | IDC        | 1.9            | 3           | 0(6)                  | (-) | (-) | (+) | (+) | (-)  | 2    | 0          | 25.83                  | yes                         |
| Breast tumor 356 | GSE45725             | GPL6883                | GSM1113095           | 4921106025_E     | FNA             | 6.3            | 47          | 0.1                 | IDC        | 3.1            | 3           | 4(22)                 | (+) | (-) | (+) | (+) | (-)  | 2    | 0          | 33.67                  | yes                         |
| Breast tumor 357 | GSE45725             | GPL6883                | GSM1113096           | 4921106025_F     | FNA             | 7.4            | 43          | 0.1                 | IDC        | 10.5           | 2           | 6(21)                 | (+) | (-) | (+) | (+) | (-)  | 2    | 0          | 32.00                  | yes                         |
| Breast tumor 358 | GSE45725             | GPL6883                | GSM1113097           | 4921106025_H     | FNA             | 5.3            | 69          | 0.2                 | IDC        | 1.4            | 2           | 0(1)                  | (-) | (-) | (-) | (-) | (+)  | 3    | 0          | 25.00                  | yes                         |
| Breast tumor 359 | GSE45725             | GPL6883                | GSM1113098           | 4921106027_A     | FNA             | 8.4            | 72          | 0.7                 | IDC        | 1.5            | 2           | 0(1)                  | (-) | (-) | (+) | (+) | (-)  | 1    | 0          | 19.10                  | yes                         |
| Breast tumor 360 | GSE45725             | GPL6883                | GSM1113099           | 4921106027_B     | FNA             | 7.6            | 45          | 0.8                 | IDC        | 2.7            | 3           | 1(33)                 | (+) | (-) | (+) | (+) | (-)  | 2    | 0          | 34.80                  | yes                         |
| Breast tumor 361 | GSE45725             | GPL6883                | GSM1113100           | 4921106027_C     | FNA             | 8.8            | 53          | 0.5                 | IDC        | 1.8            | 3           | 0(3)                  | (-) | (-) | (-) | (-) | (-)  | 3    | 0          | 32.73                  | yes                         |
| Breast tumor 362 | GSE45725             | GPL6883                | GSM1113101           | 4921106027_D     | FNA             | 7.4            | 65          | NA                  | IDC        | 1.9            | 3           | 1(18)                 | (+) | (-) | (+) | (+) | (-)  | 2    | 0          | 34.27                  | yes                         |
| Breast tumor 363 | GSE45725             | GPL6883                | GSM1113102           | 5083888043_A     | FNA             | 7.8            | 65          | 0.1                 | IDC        | 2.3            | 2           | 2(11)                 | (+) | (-) | (+) | (+) | (-)  | 2    | 0          | 29.17                  | yes                         |
| Breast tumor 364 | GSE45725             | GPL6883                | GSM1113103           | 5083888043_B     | FNA             | 8.6            | 62          | 0.7                 | ILC        | 1.2            | 2           | 0(0)                  | (-) | (-) | (+) | (-) | (-)  | 1    | 0          | 32.23                  | yes                         |
| Breast tumor 365 | GSE45725             | GPL6883                | GSM1113104           | 5083888043_C     | FNA             | NA             | 82          | 1                   | IDC        | 1.6            | 2           | 0(11)                 | (-) | (-) | (-) | (-) | (-)  | 3    | 0          | 30.80                  | no                          |
| Breast tumor 366 | GSE45725             | GPL6883                | GSM1113105           | 5083888043_D     | FNA             | 7.7            | 50          | 0.04                | DCIS       | 2.2            | NA          | NA                    | (-) | NA  | NA  | NA  | NA   | 1    | 0          | 30.50                  | no                          |
| Breast tumor 367 | GSE45725             | GPL6883                | GSM1113106           | 5083888043_E     | FNA             | 7.1            | 49          | 0.2                 | IDC        | 3              | 3           | 10(17)                | (+) | (-) | (-) | (-) | (-)  | 3    | 1          | 22.77                  | yes                         |
| Breast tumor 368 | GSE45725             | GPL6883                | GSM1113107           | 5083888043_F     | FNA             | 7              | 65          | NA                  | NA         | 1.80           | NA          | NA                    | NA  | NA  | (+) | (+) | (-)  | 2    | NA         | NA                     | no                          |
| Breast tumor 369 | GSE45725             | GPL6883                | GSM1113108           | 5083888043_G     | FNA             | 6.4            | 62          | 2.2                 | IDC        | 2.2            | 3           | 0(4)                  | (+) | (-) | (+) | (+) | (-)  | 1    | 0          | 26.20                  | yes                         |
| Breast tumor 370 | GSE45725             | GPL6883                | GSM1113109           | 5083888043_H     | FNA             | 6.8            | 61          | 0.5                 | DCIS       | 5.2            | NA          | 0(4)                  | (+) | (+) | (+) | (-) | (+)  | 3    | 0          | 26.63                  | no                          |
| Breast tumor 371 | GSE45725             | GPL6883                | GSM1113110           | 5083888049_A     | FNA             | 9              | 84          | 0.1                 | IDC        | 2.4            | 3           | 0(3)                  | (-) | (-) | (+) | (-) | (+)  | 2    | 0          | 10.50                  | yes                         |
| Breast tumor 372 | GSE45725             | GPL6883                | GSM1113111           | 5083888049_B     | FNA             | 7.6            | 55          | 0.03                | IDC        | 1.5            | 3           | 0(5)                  | (-) | (-) | (+) | (-) | (-)  | 3    | 0          | 18.60                  | yes                         |
| Breast tumor 373 | GSE45725             | GPL6883                | GSM1113112           | 5083888049_C     | FNA             | 7.5            | 38          | 0.2                 | IDC        | 2              | 2           | 0(2)                  | (+) | (-) | (+) | (+) | (-)  | 2    | 0          | 33.63                  | yes                         |
| Breast tumor 374 | GSE45725             | GPL6883                | GSM1113113           | 5083888049_D     | FNA             | 5.9            | 51          | 0.8                 | IMC        | 3              | 3           | 14(44)                | (+) | (-) | (-) | (-) | (+)  | 3    | 0          | 25.43                  | yes                         |



| Sample_title     | GEO_series_accession | GEO_platform_accession | GEO_sample_accession | GEO_raw_data/rep | Sample_type/rep | Sample_RIN/rep | Patient_age | Surgical_margin(cm) | Tumor_type | Tumor_size(cm) | Tumor_grade | Positive_LN(total_LN) | LVI | EIC | ER  | PR  | HER2 | CMTc | Recurrence | Recurrence-free_months | Used_in_the_431B_C_dataset? |
|------------------|----------------------|------------------------|----------------------|------------------|-----------------|----------------|-------------|---------------------|------------|----------------|-------------|-----------------------|-----|-----|-----|-----|------|------|------------|------------------------|-----------------------------|
| Breast tumor 375 | GSE45725             | GPL6883                | GSM1113114           | 5083888049_E     | FNA             | 7.1            | 85          | 0.7                 | IDC        | 1.5            | 2           | 1(6)                  | (+) | (-) | (+) | (+) | (-)  | 1    | 0          | 23.97                  | yes                         |
| Breast tumor 376 | GSE45725             | GPL6883                | GSM1113115           | 5083888049_F     | FNA             | 7.8            | 62          | 0.2                 | IDC        | 1.8            | 3           | 3(15)                 | (+) | (-) | (+) | (-) | (+)  | 3    | 0          | 32.27                  | yes                         |
| Breast tumor 377 | GSE45725             | GPL6883                | GSM1113116           | 5083888049_H     | FNA             | 7.6            | 68          | 0.3                 | IDC        | 1              | 1           | 0(2)                  | (+) | (-) | (+) | (+) | (-)  | 1    | 0          | 31.93                  | yes                         |
| Breast tumor 378 | GSE45725             | GPL6883                | GSM1113117           | 5083888051_A     | FNA             | 7.2            | 49          | 0                   | IDC        | 1.2            | 2           | 0(3)                  | (+) | (-) | (+) | (+) | (-)  | 1    | 0          | 27.80                  | yes                         |
| Breast tumor 379 | GSE45725             | GPL6883                | GSM1113118           | 5083888051_B     | FNA             | 7.5            | 56          | 0.6                 | IDC        | 0.3            | 2           | 0(0)                  | (-) | (+) | (-) | (-) | (+)  | 3    | 0          | 31.97                  | yes                         |
| Breast tumor 380 | GSE45725             | GPL6883                | GSM1113119           | 5083888051_C     | FNA             | 7.8            | 56          | 0.6                 | IDC        | 1.6            | 3           | 0(3)                  | (-) | (+) | (-) | (-) | (+)  | 3    | 0          | 28.97                  | yes                         |
| Breast tumor 381 | GSE45725             | GPL6883                | GSM1113120           | 5083888051_D     | FNA             | 8.8            | 48          | 0.1                 | IDC        | 3              | 3           | 0(3)                  | (-) | (-) | (+) | (-) | (+)  | 2    | 0          | 31.97                  | yes                         |
| Breast tumor 382 | GSE45725             | GPL6883                | GSM1113121           | 5083888051_E     | FNA             | 6.3            | 61          | NA                  | IDC        | 0.3            | 3           | 0(0)                  | (-) | (+) | (+) | (-) | (-)  | 2    | 0          | 27.47                  | yes                         |
| Breast tumor 383 | GSE45725             | GPL6883                | GSM1113122           | 5083888051_F     | FNA             | 7.4            | 69          | NA                  | IDC        | 1              | 2           | 1(4)                  | (-) | (-) | (+) | (+) | (-)  | 1    | 0          | 33.53                  | yes                         |
| Breast tumor 384 | GSE45725             | GPL6883                | GSM1113123           | 5083888051_G     | FNA             | 7.6            | 72          | 0.01                | IDC        | 2.1            | 1           | 1(16)                 | (-) | (-) | (+) | (+) | (-)  | 1    | 0          | 29.97                  | yes                         |
| Breast tumor 385 | GSE45725             | GPL6883                | GSM1113124           | 5083888051_H     | FNA             | 8.3            | 61          | 0.1                 | IDC        | 0.4            | 1           | 0(0)                  | (-) | (+) | (+) | (+) | (-)  | 2    | 0          | 5.03                   | no                          |
| Breast tumor 386 | GSE45725             | GPL6883                | GSM1113125           | 5083888055_A     | FNA             | 5.7            | 60          | 0                   | ILC        | 5.1            | 3           | 2(19)                 | (+) | (-) | (+) | (+) | (-)  | 2    | 0          | 32.90                  | yes                         |
| Breast tumor 387 | GSE45725             | GPL6883                | GSM1113126           | 5083888055_B     | FNA             | 7.7            | 80          | 0.3                 | DCIS/IDC   | 1.6            | 3           | NA                    | NA  | NA  | (+) | (+) | (+)  | 1    | 0          | 32.13                  | no                          |
| Breast tumor 388 | GSE45725             | GPL6883                | GSM1113127           | 5083888055_C     | FNA             | 6.2            | 57          | 0.2                 | IDC        | 1.8            | 2           | 0(3)                  | (-) | (+) | (+) | (-) | (-)  | 1    | 0          | 28.27                  | yes                         |
| Breast tumor 389 | GSE45725             | GPL6883                | GSM1113128           | 5083888055_D     | FNA             | 7.8            | NA          | NA                  | NA         | NA             | NA          | NA                    | NA  | NA  | NA  | NA  | NA   | 3    | 0          | 32.17                  | no                          |
| Breast tumor 390 | GSE45725             | GPL6883                | GSM1113129           | 5083888055_E     | FNA             | 7.8            | 32          | 0.9                 | IDC        | 2.5            | 3           | 0(7)                  | (-) | (-) | (-) | (-) | (-)  | 3    | 0          | 32.10                  | yes                         |
| Breast tumor 391 | GSE45725             | GPL6883                | GSM1113130           | 5083888055_F     | FNA             | 7.6            | 59          | 0.2                 | IDC        | 3.7            | 3           | 20(24)                | (+) | (-) | (-) | (-) | (-)  | 3    | 0          | 30.57                  | yes                         |
| Breast tumor 392 | GSE45725             | GPL6883                | GSM1113131           | 5083888055_G     | FNA             | 6.5            | 81          | 0.4                 | IDC        | 1.8            | 2           | 0(5)                  | (-) | (-) | (+) | (+) | (-)  | 3    | 0          | 32.87                  | yes                         |
| Breast tumor 393 | GSE45725             | GPL6883                | GSM1113132           | 5083888055_H     | FNA             | 5.9            | 50          | 0.2                 | IDC        | 2.8            | 3           | 3(18)                 | (-) | (-) | (-) | (-) | (-)  | 3    | 0          | 31.00                  | yes                         |
| Breast tumor 394 | GSE45725             | GPL6883                | GSM1113133           | 5083888056_A     | FNA             | 9              | 48          | 0.3                 | IDC        | 1.6            | 3           | 0(3)                  | (-) | (-) | (+) | (+) | (-)  | 2    | 0          | 26.93                  | yes                         |
| Breast tumor 395 | GSE45725             | GPL6883                | GSM1113134           | 5083888056_B     | FNA             | 8.8            | 54          | 1                   | ILC        | 0.9            | 2           | 0(3)                  | (-) | (-) | (-) | (-) | (-)  | 1    | 0          | 25.63                  | yes                         |
| Breast tumor 396 | GSE45725             | GPL6883                | GSM1113135           | 5083888056_C     | FNA             | 7.9            | 77          | 0.3                 | IDC        | 3.3            | 2           | 0(1)                  | (-) | (-) | (+) | (-) | (-)  | 2    | 0          | 18.93                  | yes                         |
| Breast tumor 397 | GSE45725             | GPL6883                | GSM1113136           | 5083888056_D     | FNA             | 8.6            | 40          | 0.3                 | IDC        | 2.4            | 3           | 0(4)                  | (-) | (+) | (+) | (-) | (+)  | 3    | 0          | 32.00                  | yes                         |
| Breast tumor 398 | GSE45725             | GPL6883                | GSM1113137           | 5083888056_E     | FNA             | 6.8            | 61          | 0.5                 | IDC        | 3.1            | 3           | 0(4)                  | (-) | (-) | (-) | (-) | (+)  | 3    | 0          | 30.40                  | yes                         |
| Breast tumor 399 | GSE45725             | GPL6883                | GSM1113138           | 5083888056_F     | FNA             | 7.7            | 50          | 0.5                 | DCIS       | 3.7            | NA          | 0(0)                  | (-) | (-) | NA  | NA  | NA   | 3    | 0          | 21.07                  | no                          |
| Breast tumor 400 | GSE45725             | GPL6883                | GSM1113139           | 5083888056_G     | FNA             | 6.3            | 46          | 0.4                 | IDC        | 2              | 3           | 2(4)                  | (-) | (-) | (-) | (-) | (-)  | 3    | 0          | 29.90                  | yes                         |
| Breast tumor 401 | GSE45725             | GPL6883                | GSM1113140           | 5083888056_H     | FNA             | 9.3            | 46          | 0.1                 | IDC        | 1.9            | 3           | 1(17)                 | (-) | (-) | (+) | (-) | (+)  | 3    | 0          | 28.63                  | yes                         |
| Breast tumor 402 | GSE45725             | GPL6883                | GSM1113141           | 5083888057_A     | FNA             | 9              | 82          | <0.05               | IDC/DCIS   | 1.9            | 3           | 0(3)                  | (-) | (-) | (+) | (-) | (-)  | 3    | 0          | 26.63                  | yes                         |
| Breast tumor 403 | GSE45725             | GPL6883                | GSM1113142           | 5083888057_B     | FNA             | 7.1            | 41          | 0.1                 | IDC        | 2              | 3           | 2(19)                 | (+) | (-) | (+) | (+) | (-)  | 2    | 0          | 32.33                  | yes                         |
| Breast tumor 404 | GSE45725             | GPL6883                | GSM1113143           | 5083888057_C     | FNA             | 6.1            | 61          | 0.5                 | IDC        | 2.5            | 2           | 0(2)                  | (+) | (-) | (-) | (-) | (+)  | 3    | 0          | 28.43                  | yes                         |
| Breast tumor 405 | GSE45725             | GPL6883                | GSM1113144           | 5083888057_D     | FNA             | 6.5            | 70          | 1                   | ILC        | 1.9            | 2           | 1(11)                 | (-) | (-) | (+) | (+) | (-)  | 1    | 0          | 23.90                  | yes                         |
| Breast tumor 406 | GSE45725             | GPL6883                | GSM1113145           | 5083888057_E     | FNA             | 8.2            | 54          | 0.2                 | IDC        | 2.6            | 3           | 3(13)                 | (+) | (-) | (+) | (-) | (-)  | 2    | 0          | 30.63                  | yes                         |
| Breast tumor 407 | GSE45725             | GPL6883                | GSM1113146           | 5083888057_F     | FNA             | 9.6            | 59          | 1                   | IDC        | 3.7            | 2           | 6(14)                 | (+) | (-) | (+) | (+) | (+)  | 2    | 0          | 23.37                  | yes                         |
| Breast tumor 408 | GSE45725             | GPL6883                | GSM1113147           | 5083888057_G     | FNA             | 7.1            | 49          | NA                  | NA         | NA             | NA          | NA                    | NA  | NA  | NA  | NA  | NA   | 2    | 0          | 31.97                  | no                          |
| Breast tumor 409 | GSE45725             | GPL6883                | GSM1113148           | 5083888057_H     | FNA             | 7.9            | 61          | 0.2                 | IDC        | 1.4            | 1           | 0(5)                  | (+) | (-) | (+) | (+) | (-)  | 1    | 0          | 32.13                  | yes                         |
| Breast tumor 410 | GSE45725             | GPL6883                | GSM1113149           | 4936527003_A     | FNA             | 5.1            | 66          | 0.4                 | IDC        | 3.6            | 3           | 20(28)                | (+) | (+) | (+) | (+) | (-)  | 2    | 0          | 31.93                  | yes                         |
| Breast tumor 411 | GSE45725             | GPL6883                | GSM1113150           | 4936527003_B     | FNA             | 7.4            | 49          | 0.3                 | IDC        | 1.8            | 1           | 0(1)                  | (-) | (-) | (+) | (+) | (-)  | 1    | 0          | 28.30                  | yes                         |
| Breast tumor 412 | GSE45725             | GPL6883                | GSM1113151           | 4936527003_C     | FNA             | 9.4            | 64          | 0.6                 | IDC        | 2.7            | 2           | 1(13)                 | (+) | (-) | (-) | (-) | (+)  | 3    | 0          | 29.83                  | yes                         |
| Breast tumor 413 | GSE45725             | GPL6883                | GSM1113152           | 4936527003_D     | FNA             | 9.2            | 61          | 0.4                 | IDC        | 1.5            | 2           | 0(1)                  | (-) | (-) | (+) | (-) | (-)  | 2    | 0          | 31.30                  | yes                         |
| Breast tumor 414 | GSE45725             | GPL6883                | GSM1113153           | 4936527003_E     | FNA             | 7.8            | 53          | 0.3                 | IDC        | 3              | 3           | 21(38)                | (-) | (-) | (+) | (+) | (-)  | 1    | 0          | 11.60                  | yes                         |
| Breast tumor 415 | GSE45725             | GPL6883                | GSM1113154           | 4936527003_F     | FNA             | 7.6            | 73          | 0.5                 | IDC        | 2.2            | 2           | 1(12)                 | (+) | (-) | (+) | (+) | (-)  | 1    | 0          | 28.80                  | yes                         |
| Breast tumor 416 | GSE45725             | GPL6883                | GSM1113155           | 4936527003_G     | FNA             | NA             | 44          | 1                   | IDC        | 2.8            | 2           | 0(5)                  | (+) | (-) | (+) | (-) | (-)  | 2    | 0          | 12.03                  | no                          |
| Breast tumor 417 | GSE45725             | GPL6883                | GSM1113156           | 4936527026_A     | FNA             | 9.6            | 81          | 0.9                 | IDC        | 1.5            | 1           | 0(4)                  | (+) | (-) | (+) | (+) | (-)  | 2    | 0          | 31.40                  | yes                         |
| Breast tumor 418 | GSE45725             | GPL6883                | GSM1113157           | 4936527026_B     | FNA             | 8.2            | 70          | 0.9                 | IDC        | 2.6            | 1           | 4(21)                 | (-) | (-) | (+) | (+) | (-)  | 1    | 0          | 30.87                  | yes                         |
| Breast tumor 419 | GSE45725             | GPL6883                | GSM1113158           | 4936527026_C     | FNA             | 9.6            | 63          | 0.2                 | IDC        | 1.3            | 2           | 2(47)                 | (-) | (-) | (-) | (-) | (-)  | 3    | 0          | 29.17                  | yes                         |
| Breast tumor 420 | GSE45725             | GPL6883                | GSM1113159           | 4936527026_E     | FNA             | 7.7            | 58          | 0.6                 | IDC        | 0.7            | 2           | 0(6)                  | (+) | (-) | (+) | (-) | (-)  | 3    | 0          | 24.43                  | yes                         |
| Breast tumor 421 | GSE45725             | GPL6883                | GSM1113160           | 4936527026_F     | FNA             | 6.8            | 44          | 0.5                 | IMC        | 0.9            | 1           | 0(3)                  | (-) | (-) | (+) | (+) | (-)  | 1    | 0          | 9.47                   | yes                         |

| Sample_title     | GEO_series_accession | GEO_platform_accession | GEO_sample_accession | GEO_raw_data/rep | Sample_type/rep | Sample_RIN/rep | Patient_age | Surgical_margin(cm) | Tumor_type | Tumor_size(cm) | Tumor_grade | Positive_LN(total_LN) | LVI | EIC | ER  | PR  | HER2 | CMTc | Recurrence | Recurrence-free_months | Used_in_the_431B_C_dataset? |
|------------------|----------------------|------------------------|----------------------|------------------|-----------------|----------------|-------------|---------------------|------------|----------------|-------------|-----------------------|-----|-----|-----|-----|------|------|------------|------------------------|-----------------------------|
| Breast tumor 422 | GSE45725             | GPL6883                | GSM1113161           | 4936527026_G     | FNA             | 7              | 40          | NA                  | DCIS       | 1.5            | NA          | NA                    | NA  | NA  | NA  | NA  | NA   | 1    | 0          | 28.30                  | no                          |
| Breast tumor 423 | GSE45725             | GPL6883                | GSM1113162           | 4936527026_H     | FNA             | 8.1            | 61          | 0.5                 | IDC        | 0.4            | 2           | 0(0)                  | (-) | (-) | (+) | (+) | (-)  | 2    | 0          | 21.40                  | yes                         |
| Breast tumor 424 | GSE45725             | GPL6883                | GSM1113163           | 5392306038_A     | FNA             | 7.2            | 45          | 0.5                 | IDC        | 0.2            | 2           | 3(7)                  | (+) | (+) | (+) | (+) | (-)  | 1    | 0          | 27.80                  | yes                         |
| Breast tumor 425 | GSE45725             | GPL6883                | GSM1113164           | 5392306038_B     | FNA             | 6.6            | 49          | 0.6                 | IDC        | 2              | 3           | 2(23)                 | (-) | (-) | (-) | (-) | (+)  | 3    | 0          | 21.50                  | yes                         |
| Breast tumor 426 | GSE45725             | GPL6883                | GSM1113165           | 5392306038_C     | FNA             | 9.1            | 48          | 0.3                 | IDC        | 3.2            | 2           | 1(12)                 | (-) | (-) | (+) | (+) | (-)  | 2    | 0          | 30.33                  | yes                         |
| Breast tumor 427 | GSE45725             | GPL6883                | GSM1113166           | 5392306038_D     | FNA             | 7.4            | 94          | 0.1                 | IDC        | 2.1            | 3           | 0(3)                  | (-) | (-) | (+) | (+) | (+)  | 2    | 0          | 25.83                  | yes                         |
| Breast tumor 428 | GSE45725             | GPL6883                | GSM1113167           | 5392306038_E     | FNA             | 6.9            | 51          | 0.5                 | IDC        | 3.5            | 2           | 0(3)                  | (-) | (-) | (+) | (+) | (-)  | 1    | 0          | 28.90                  | yes                         |
| Breast tumor 429 | GSE45725             | GPL6883                | GSM1113168           | 5392306038_F     | FNA             | 8.3            | 74          | 0.2                 | IDC        | 2.2            | 1           | 0(4)                  | (-) | (-) | (+) | (+) | (-)  | 1    | 0          | 28.43                  | yes                         |
| Breast tumor 430 | GSE45725             | GPL6883                | GSM1113169           | 5392306038_G     | FNA             | 8.8            | 53          | 0.3                 | IDC        | 2.1            | 3           | 0(3)                  | (-) | (-) | (+) | (+) | (-)  | 2    | 0          | 25.00                  | yes                         |
| Breast tumor 431 | GSE45725             | GPL6883                | GSM1113170           | 5392306038_H     | FNA             | 7.8            | 62          | NA                  | IDC        | 1.5            | 2           | 0(3)                  | (-) | (-) | (+) | (+) | (-)  | 1    | 0          | 30.87                  | yes                         |
| Breast tumor 432 | GSE45725             | GPL6883                | GSM1113171           | 5392306045_A     | FNA             | 8.9            | 57          | 0.3                 | IDC        | 3.2            | 2           | 0(22)                 | (-) | (-) | (+) | (+) | (-)  | 1    | 0          | 28.87                  | yes                         |
| Breast tumor 433 | GSE45725             | GPL6883                | GSM1113172           | 5392306045_B     | FNA             | 7.7            | 73          | NA                  | ILC        | 2.2            | 2           | 0(5)                  | (+) | (-) | (+) | (+) | (-)  | 2    | 0          | 29.13                  | yes                         |
| Breast tumor 434 | GSE45725             | GPL6883                | GSM1113173           | 5392306045_C     | FNA             | 7.6            | 53          | NA                  | IDC        | 0.1            | NA          | 0(4)                  | (-) | (-) | (-) | (-) | (+)  | 3    | 0          | 3.87                   | no                          |
| Breast tumor 435 | GSE45725             | GPL6883                | GSM1113174           | 5392306045_D     | FNA             | 9.6            | 50          | 0.09                | IDC        | 1.1            | 3           | 0(16)                 | (+) | (-) | (+) | (+) | (-)  | 2    | 0          | 27.00                  | yes                         |
| Breast tumor 436 | GSE45725             | GPL6883                | GSM1113175           | 5392306045_E     | FNA             | 8.7            | 64          | 0.7                 | IDC        | 1.8            | 3           | 0(5)                  | (-) | (-) | (+) | (+) | (-)  | 3    | 0          | 23.83                  | yes                         |
| Breast tumor 437 | GSE45725             | GPL6883                | GSM1113176           | 5392306045_F     | FNA             | 7.5            | 48          | 0.01                | DCIS       | 1.6            | NA          | NA                    | NA  | NA  | NA  | NA  | NA   | 1    | 0          | 27.60                  | no                          |
| Breast tumor 438 | GSE45725             | GPL6883                | GSM1113177           | 5392306045_G     | FNA             | 8.5            | 53          | 0.13                | IDC        | 3.8            | 2           | 6(32)                 | (+) | (-) | (+) | (+) | (-)  | 2    | NA         | NA                     | no                          |
| Breast tumor 439 | GSE45725             | GPL6883                | GSM1113178           | 5392306045_H     | FNA             | 8              | 75          | 0.3                 | IDC        | 3              | 3           | 0(7)                  | (-) | (-) | (+) | (+) | (-)  | 2    | 1          | 23.87                  | yes                         |
| Breast tumor 440 | GSE45725             | GPL6883                | GSM1113179           | 5392306052_A     | FNA             | 7.8            | 49          | 0.1                 | IDC        | 1.2            | 1           | 0(0)                  | (-) | (+) | (+) | (+) | (-)  | 2    | 0          | 26.90                  | yes                         |
| Breast tumor 441 | GSE45725             | GPL6883                | GSM1113180           | 5392306052_B     | FNA             | 5.7            | 42          | 0.225               | IDC/DCIS   | 2.6            | 3           | 0(4)                  | (-) | (-) | (-) | (-) | (-)  | 3    | 0          | 26.33                  | yes                         |
| Breast tumor 442 | GSE45725             | GPL6883                | GSM1113181           | 5392306052_C     | FNA             | 6.9            | 56          | 0.5                 | IDC        | 4.8            | 3           | 0(9)                  | (-) | (-) | (+) | (+) | (-)  | 2    | 0          | 24.43                  | yes                         |
| Breast tumor 443 | GSE45725             | GPL6883                | GSM1113182           | 5392306052_D     | FNA             | 6.8            | 58          | >0.7                | DCIS/IDC   | 5.8            | 3           | 1(2)                  | (+) | (+) | (-) | (-) | (-)  | 3    | 0          | 13.60                  | no                          |
| Breast tumor 444 | GSE45725             | GPL6883                | GSM1113183           | 5392306052_E     | FNA             | 7.2            | 48          | 0.75                | IDC        | 2.2            | 2           | 0/3                   | (+) | (+) | (+) | (+) | (-)  | 2    | 0          | 27.13                  | yes                         |
| Breast tumor 445 | GSE45725             | GPL6883                | GSM1113184           | 5392306052_F     | FNA             | 9.1            | 58          | 0.1                 | ILC        | 10             | 2           | 0(10)                 | (-) | (-) | (+) | (-) | (-)  | 2    | 0          | 24.63                  | yes                         |
| Breast tumor 446 | GSE45725             | GPL6883                | GSM1113185           | 5392306052_G     | FNA             | 9              | 80          | 0                   | ILC        | 5.7            | 3           | 1(11)                 | (-) | (-) | (+) | (+) | (-)  | 2    | 0          | 26.03                  | yes                         |
| Breast tumor 447 | GSE45725             | GPL6883                | GSM1113186           | 5392306052_H     | FNA             | 8.4            | 45          | 0.5                 | IDC        | 1.5            | 2           | 0(2)                  | (-) | (-) | (+) | (+) | (-)  | 1    | 0          | 25.00                  | yes                         |
| Breast tumor 448 | GSE45725             | GPL6883                | GSM1113187           | 5392306053_A     | FNA             | 9.4            | 54          | 0.5                 | IMC        | 1.8            | 2           | 0(5)                  | (-) | (-) | (+) | (+) | (-)  | 1    | 0          | 19.40                  | yes                         |
| Breast tumor 449 | GSE45725             | GPL6883                | GSM1113188           | 5392306053_B     | FNA             | 9.2            | 62          | 2                   | IDC        | 1.1            | 2           | 0(4)                  | (-) | (-) | (+) | (+) | (-)  | 2    | 0          | 25.17                  | yes                         |
| Breast tumor 450 | GSE45725             | GPL6883                | GSM1113189           | 5392306053_C     | FNA             | 8.6            | 44          | 0.08                | ILC        | 1.4            | 2           | 1(25)                 | (-) | (-) | (+) | (+) | (-)  | 1    | 0          | 22.63                  | yes                         |
| Breast tumor 451 | GSE45725             | GPL6883                | GSM1113190           | 5392306053_D     | FNA             | 5.7            | 67          | 0.4                 | IDC        | 1.6            | 3           | 1(3)                  | (+) | (-) | (+) | (-) | (+)  | 2    | 0          | 27.33                  | yes                         |
| Breast tumor 452 | GSE45725             | GPL6883                | GSM1113191           | 5392306053_E     | FNA             | 7.3            | 38          | 0.2                 | DCIS/IDC   | 0.1            | NA          | 0(2)                  | (-) | (-) | (+) | (-) | (-)  | 3    | 0          | 28.30                  | no                          |
| Breast tumor 453 | GSE45725             | GPL6883                | GSM1113192           | 5392306053_F     | FNA             | 7.4            | 55          | 0.2                 | IDC        | 1.5            | 3           | 0(1)                  | (-) | (-) | (+) | (-) | (-)  | 2    | 0          | 26.70                  | yes                         |
| Breast tumor 454 | GSE45725             | GPL6883                | GSM1113193           | 5392306053_G     | FNA             | 8.2            | 51          | 0.3                 | IDC        | 1.6            | 1           | 1(20)                 | (-) | (-) | (+) | (+) | (-)  | 1    | 0          | 27.80                  | yes                         |
| Breast tumor 455 | GSE45725             | GPL6883                | GSM1113194           | 5392306053_H     | FNA             | 6.7            | 55          | 0.1                 | IDC        | 1.7            | 2           | 0(3)                  | (-) | (-) | (+) | (+) | (-)  | 2    | 0          | 3.70                   | no                          |
| Breast tumor 456 | GSE45725             | GPL6883                | GSM1113195           | 5371062047_A     | FNA             | 7.1            | 53          | 0.7                 | IDC        | 0.8            | 3           | 0(2)                  | (-) | (-) | (+) | (+) | (+)  | 3    | 0          | 13.03                  | yes                         |
| Breast tumor 457 | GSE45725             | GPL6883                | GSM1113196           | 5371062047_C     | FNA             | 8.9            | 50          | 0.2                 | IDC        | 1.8            | 3           | 0(3)                  | (-) | (+) | (+) | (+) | (-)  | 3    | 0          | 21.63                  | yes                         |
| Breast tumor 458 | GSE45725             | GPL6883                | GSM1113197           | 5371062047_D     | FNA             | 6.9            | 39          | 0.3                 | IDC        | 1.3            | 3           | 0/3                   | (-) | (-) | (+) | (+) | (-)  | 1    | 0          | 18.33                  | yes                         |
| Breast tumor 459 | GSE45725             | GPL6883                | GSM1113198           | 5371062047_E     | FNA             | 6.6            | 42          | 0.1                 | IDC        | 0.9            | 1           | 0(2)                  | (-) | (-) | (+) | (+) | (-)  | 1    | 0          | 5.23                   | no                          |
| Breast tumor 460 | GSE45725             | GPL6883                | GSM1113199           | 5371062047_F     | FNA             | 8.6            | 59          | NA                  | DCIS       | 3.3            | NA          | 0(0)                  | NA  | NA  | NA  | NA  | NA   | 2    | 0          | 27.87                  | no                          |
| Breast tumor 461 | GSE45725             | GPL6883                | GSM1113200           | 5371062047_G     | FNA             | 6.8            | 61          | 0.8                 | IDC        | 2.2            | 3           | 0(10)                 | (-) | (-) | (+) | (-) | (+)  | 2    | 0          | 26.57                  | yes                         |
| Breast tumor 462 | GSE45725             | GPL6883                | GSM1113201           | 5371062047_H     | FNA             | 8              | 71          | 0.02                | IDC        | 2.2            | 3           | 0(4)                  | (+) | (-) | (+) | (+) | (-)  | 2    | 0          | 26.90                  | yes                         |
| Breast tumor 463 | GSE45725             | GPL6883                | GSM1113202           | 5371062058_A     | FNA             | NA             | 65          | 0.08                | IDC        | 4.8            | 3           | 0(2)                  | (+) | (-) | (-) | (-) | (-)  | 3    | 1          | 12.30                  | no                          |
| Breast tumor 464 | GSE45725             | GPL6883                | GSM1113203           | 5371062058_B     | FNA             | 6.4            | 76          | 0.1                 | IDC        | 2.9            | 3           | 1(4)                  | (+) | (-) | (-) | (-) | (-)  | 3    | 0          | 13.57                  | yes                         |
| Breast tumor 465 | GSE45725             | GPL6883                | GSM1113204           | 5371062058_C     | FNA             | 7.9            | 50          | 0.1                 | IDC        | 1              | 2           | 0(2)                  | (+) | (-) | (+) | (+) | (-)  | 2    | 0          | 22.67                  | yes                         |
| Breast tumor 466 | GSE45725             | GPL6883                | GSM1113205           | 5371062058_D     | FNA             | 6.1            | 62          | 0.3                 | IDC        | 2.8            | 3           | 0(6)                  | (+) | (-) | (-) | (-) | (-)  | 3    | 0          | 25.83                  | yes                         |
| Breast tumor 467 | GSE45725             | GPL6883                | GSM1113206           | 5371062058_E     | FNA             | 5.9            | 51          | 1                   | IDC        | 3.8            | 3           | 1(7)                  | (+) | (-) | (+) | (-) | (-)  | 2    | 0          | 26.57                  | yes                         |
| Breast tumor 468 | GSE45725             | GPL6883                | GSM1113207           | 5371062058_F     | FNA             | 6.8            | 76          | NA                  | IDC        | 2.7            | 1           | 2(22)                 | (-) | (-) | (+) | (+) | (-)  | 1    | 0          | 0.50                   | no                          |

| Sample_title     | GEO_series_accession | GEO_platform_accession | GEO_sample_accession | GEO_raw_data/rep | Sample_type/rep | Sample_RIN/rep | Patient_age | Surgical_margin(cm) | Tumor_type | Tumor_size(cm) | Tumor_grade | Positive_LN(total_LN) | LVI | EIC | ER  | PR  | HER2 | CMTC | Recurrence | Recurrence-free_months | Used_in_the_431B_C_dataset? |
|------------------|----------------------|------------------------|----------------------|------------------|-----------------|----------------|-------------|---------------------|------------|----------------|-------------|-----------------------|-----|-----|-----|-----|------|------|------------|------------------------|-----------------------------|
| Breast tumor 469 | GSE45725             | GPL6883                | GSM1113208           | 5371062058_G     | FNA             | 6.6            | 74          | 0.5                 | IDC        | 2              | 3           | 0(3)                  | (-) | (-) | (+) | (+) | (-)  | 2    | 0          | 21.93                  | yes                         |
| Breast tumor 470 | GSE45725             | GPL6883                | GSM1113209           | 5371062058_H     | FNA             | 8.3            | 66          | NA                  | IDC        | 2.3            | 3           | 10(26)                | (+) | (-) | (+) | (+) | (-)  | 2    | NA         | NA                     | no                          |
| Breast tumor 471 | GSE45725             | GPL6883                | GSM1113210           | 5392306058_A     | FNA             | 8.5            | 47          | 0.1                 | IDC        | 4.8            | 3           | 0(3)                  | (-) | (-) | (+) | (+) | (-)  | 2    | 0          | 24.53                  | yes                         |
| Breast tumor 472 | GSE45725             | GPL6883                | GSM1113211           | 5392306058_B     | FNA             | 7.6            | 49          | 0.1                 | IDC        | 4.8            | 3           | 3(21)                 | (+) | (-) | (-) | (-) | (+)  | 3    | 0          | 26.13                  | yes                         |
| Breast tumor 473 | GSE45725             | GPL6883                | GSM1113212           | 5392306058_D     | FNA             | 9.2            | 43          | NA                  | NA         | NA             | NA          | NA                    | NA  | NA  | NA  | NA  | NA   | 1    | 0          | 18.33                  | no                          |
| Breast tumor 474 | GSE45725             | GPL6883                | GSM1113213           | 5392306058_E     | FNA             | 8.7            | 55          | 0.3                 | IDC        | 1.4            | 3           | 0(2)                  | (+) | (-) | (+) | (+) | (-)  | 2    | 0          | 24.07                  | yes                         |
| Breast tumor 475 | GSE45725             | GPL6883                | GSM1113214           | 5392306058_F     | FNA             | 9              | 71          | 0.8                 | IDC        | 1.1            | 3           | 0(2)                  | (-) | (-) | (+) | (+) | (-)  | 1    | 0          | 25.00                  | yes                         |
| Breast tumor 476 | GSE45725             | GPL6883                | GSM1113215           | 5392306058_G     | FNA             | 9              | 59          | NA                  | DCIS       | 5              | NA          | 0(0)                  | NA  | NA  | NA  | NA  | NA   | 1    | 0          | 23.43                  | no                          |
| Breast tumor 477 | GSE45725             | GPL6883                | GSM1113216           | 5392306058_H     | FNA             | 6.9            | 41          | 0.6                 | IDC        | 1.9            | 3           | 3(19)                 | (-) | (-) | (-) | (-) | (-)  | 3    | 0          | 22.70                  | yes                         |
| Breast tumor 478 | GSE45725             | GPL6883                | GSM1113217           | 5392306060_A     | FNA             | 7.2            | 74          | 1.1                 | IDC        | 1.2            | 3           | 0(24)                 | (-) | (+) | (+) | (+) | (-)  | 2    | 0          | 26.63                  | yes                         |
| Breast tumor 479 | GSE45725             | GPL6883                | GSM1113218           | 5392306060_B     | FNA             | 6.1            | 64          | 0.3                 | IDC        | 1.7            | 2           | 0(2)                  | (-) | (-) | (+) | (-) | (+)  | 3    | 0          | 6.57                   | yes                         |
| Breast tumor 480 | GSE45725             | GPL6883                | GSM1113219           | 5392306060_C     | FNA             | 8.6            | 70          | 0.08                | IDC        | 4              | 3           | 0(8)                  | (-) | (-) | (-) | (-) | (-)  | 3    | NA         | NA                     | no                          |
| Breast tumor 481 | GSE45725             | GPL6883                | GSM1113220           | 5392306060_D     | FNA             | 7.1            | 70          | NA                  | IDC        | 1              | 3           | 0(2)                  | (-) | (-) | (-) | (-) | (-)  | 3    | 0          | 25.00                  | yes                         |
| Breast tumor 482 | GSE45725             | GPL6883                | GSM1113221           | 5392306060_E     | FNA             | 7.8            | 56          | 1.2                 | IDC        | 3              | 3           | 0(6)                  | (-) | (-) | (+) | (+) | (-)  | 2    | 0          | 23.57                  | yes                         |
| Breast tumor 483 | GSE45725             | GPL6883                | GSM1113222           | 5392306060_F     | FNA             | 8              | 71          | 2                   | IDC        | 7              | 2           | 4(20)                 | (+) | (-) | (+) | (+) | (-)  | 1    | 0          | 26.40                  | yes                         |
| Breast tumor 484 | GSE45725             | GPL6883                | GSM1113223           | 5392306060_G     | FNA             | 6.4            | 58          | 0                   | IDC        | 1.6            | 3           | 2(20)                 | (-) | (-) | (+) | (-) | (-)  | 2    | 0          | 25.70                  | yes                         |
| Breast tumor 485 | GSE45725             | GPL6883                | GSM1113224           | 5392306060_H     | FNA             | 8.8            | 43          | 0.2                 | IDC        | 2.2            | 2           | 0(1)                  | (-) | (-) | (+) | (+) | (-)  | 1    | 0          | 26.13                  | yes                         |
| Breast tumor 486 | GSE45725             | GPL6883                | GSM1113225           | 5542829005_A     | FNA             | 6.5            | 47          | 0.5                 | IDC        | 3.7            | 3           | 3(20)                 | (+) | (-) | (+) | (+) | (-)  | 2    | 0          | 25.43                  | yes                         |
| Breast tumor 487 | GSE45725             | GPL6883                | GSM1113226           | 5542829005_B     | FNA             | 8.2            | 86          | 0.3                 | IDC        | 2.1            | 1           | 0(2)                  | (-) | (+) | (+) | (+) | (-)  | 1    | 0          | 26.77                  | yes                         |
| Breast tumor 488 | GSE45725             | GPL6883                | GSM1113227           | 5542829005_C     | FNA             | 6.4            | 46          | 1                   | IDC        | 3.8            | 3           | 1(18)                 | (+) | (-) | (-) | (-) | (-)  | 3    | 0          | 24.77                  | yes                         |
| Breast tumor 489 | GSE45725             | GPL6883                | GSM1113228           | 5542829005_D     | FNA             | 9.2            | 58          | 0.6                 | IDC        | 1.3            | 2           | 1(20)                 | (+) | (-) | (+) | (+) | (-)  | 1    | 0          | 26.10                  | yes                         |
| Breast tumor 490 | GSE45725             | GPL6883                | GSM1113229           | 5542829005_E     | FNA             | 5.8            | 87          | 0.5                 | IDC        | 2.1            | 3           | 0(2)                  | (-) | (+) | (-) | (-) | (-)  | 3    | 1          | 9.83                   | yes                         |
| Breast tumor 491 | GSE45725             | GPL6883                | GSM1113230           | 5542829005_F     | FNA             | 6.7            | 41          | 0.4                 | IDC        | 4.4            | 2           | 2(22)                 | (+) | (-) | (+) | (-) | (-)  | 1    | 0          | 23.40                  | yes                         |
| Breast tumor 492 | GSE45725             | GPL6883                | GSM1113231           | 5542829005_G     | FNA             | 8.6            | 44          | 0.29                | IDC        | 2.1            | 2           | 1(5)                  | (-) | (-) | (+) | (-) | (-)  | 2    | 0          | 25.90                  | yes                         |
| Breast tumor 493 | GSE45725             | GPL6883                | GSM1113232           | 5542829005_H     | FNA             | 7              | 50          | 1                   | IDC        | 1.8            | 3           | 0(2)                  | (+) | (-) | (+) | (+) | (+)  | 2    | 0          | 23.93                  | yes                         |
| Breast tumor 494 | GSE45725             | GPL6883                | GSM1113233           | 5542829016_A     | FNA             | 7.1            | 61          | 1                   | DCIS       | 0.03           | 2           | 0(0)                  | NA  | NA  | NA  | NA  | NA   | 2    | 0          | 25.53                  | no                          |
| Breast tumor 495 | GSE45725             | GPL6883                | GSM1113234           | 5542829016_B     | FNA             | 6.2            | 58          | 1.2                 | IDC        | 2.2            | 2           | 1(18)                 | (+) | (-) | (+) | (+) | (-)  | 1    | 0          | 21.07                  | yes                         |
| Breast tumor 496 | GSE45725             | GPL6883                | GSM1113235           | 5542829016_C     | FNA             | 8.2            | 55          | 0                   | IDC        | 0.2            | 2           | 0(0)                  | (-) | (+) | (+) | (+) | (-)  | 1    | 0          | 23.53                  | yes                         |
| Breast tumor 497 | GSE45725             | GPL6883                | GSM1113236           | 5542829016_D     | FNA             | 7.8            | 77          | 0.2                 | IDC        | 0.1            | 2           | 0(0)                  | (+) | (+) | (+) | (+) | (-)  | 2    | 0          | 13.33                  | yes                         |
| Breast tumor 498 | GSE45725             | GPL6883                | GSM1113237           | 5542829016_E     | FNA             | 8.9            | 59          | 0.5                 | IDC        | 1.6            | 3           | 0(3)                  | (+) | (-) | (+) | (+) | (-)  | 2    | 0          | 23.47                  | yes                         |
| Breast tumor 499 | GSE45725             | GPL6883                | GSM1113238           | 5542829016_F     | FNA             | 7.7            | 62          | 0.3                 | IDC        | 2.1            | 2           | 0(3)                  | (-) | (-) | (+) | (+) | (-)  | 2    | 0          | 27.73                  | yes                         |
| Breast tumor 500 | GSE45725             | GPL6883                | GSM1113239           | 5542829016_G     | FNA             | 7.5            | 60          | 0                   | IDC        | 5.5            | 2           | 2(22)                 | (+) | (+) | (+) | (+) | (-)  | 1    | 0          | 23.63                  | yes                         |
| Breast tumor 501 | GSE45725             | GPL6883                | GSM1113240           | 5542829016_H     | FNA             | 7.6            | 38          | 0.3                 | IDC        | 1.4            | 2           | 0(2)                  | (+) | (-) | (+) | (+) | (-)  | 2    | 0          | 22.70                  | yes                         |
